# Supplementary material for: Differences in TCR repertoire and T cell activation underlie the divergent outcomes of antitumor immune responses in tumor-eradicating versus tumor-progressing hosts
Source: HighWire-hosted journal article supplement (doi:10.1136/jitc-2020-001615), 2021-01-01
Supplement: jitc-2020-001615supp001_data_supplement.zip [file jitc-2020-001615supp001_data_supplement.zip]

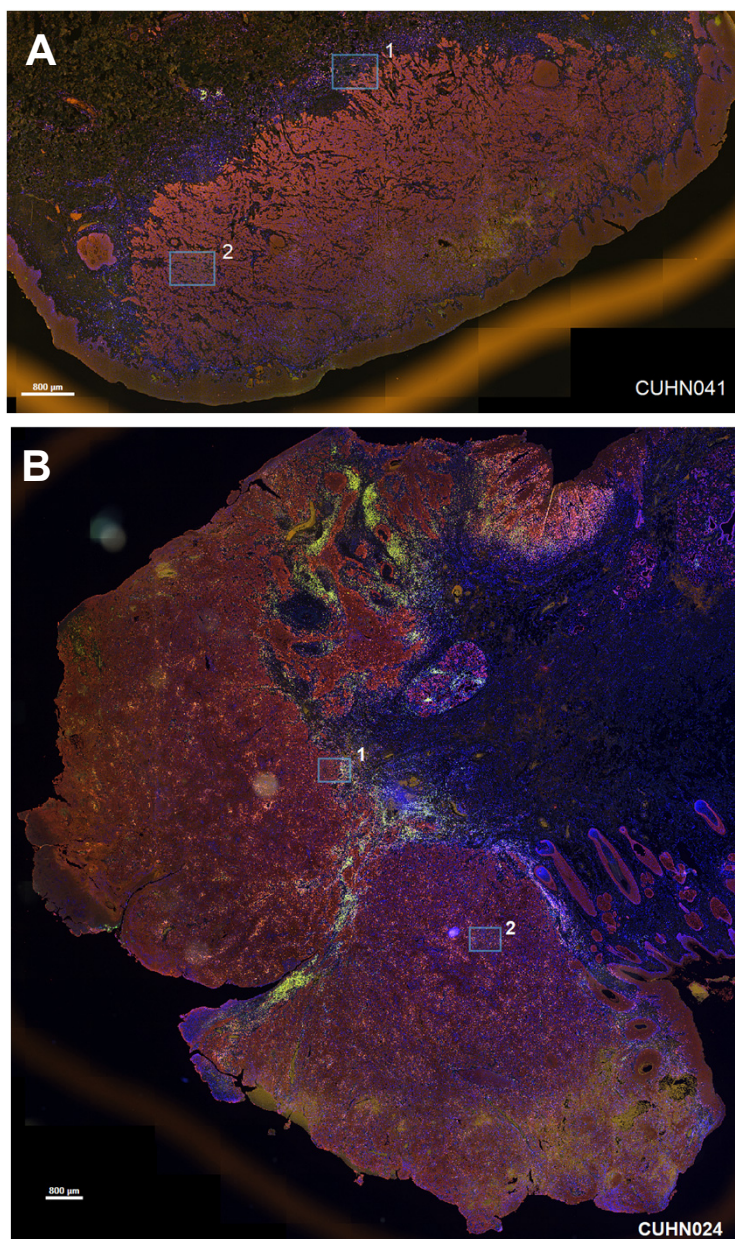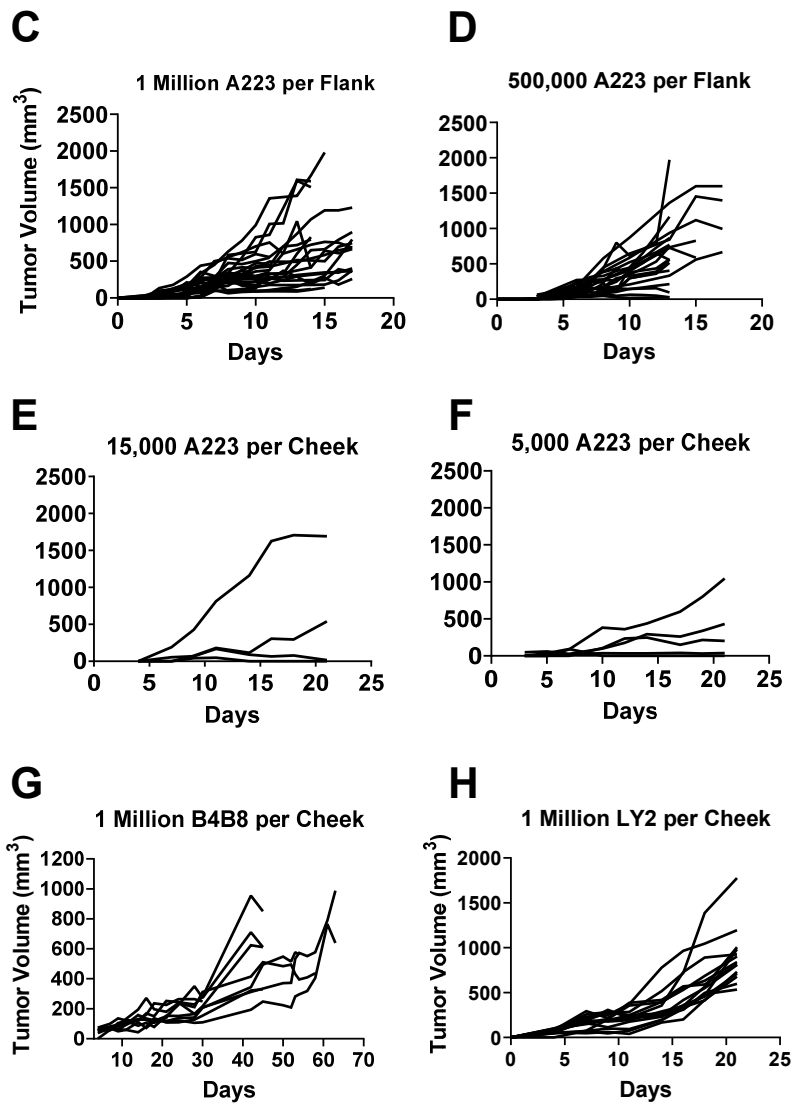

**Supplemental Figure 1: Heterogeneous immune responses in Head and Neck Cancer.** (A) Whole-slide scan image by Phenochart for patient CUHN041 (poorly infiltrated, shown in Figure 1A). Blue rectangle 1 represents a region of tumor invasive margin while blue rectangle 2 represents a region of tumor core in the CUHN041 sample. (B) Whole-slide scan image by Phenochart for patient CUHN024 (highly infiltrated, shown in Figure 1A). Blue rectangle 1 represents a region of tumor invasive margin while blue rectangle 2 represents a region of tumor core in the CUHN024 sample. Scale bars indicate 800 $\mu$ m. (C-F) A223 tumors grow heterogeneously when different cell numbers were injected into C57BL/6J mice at (C) 1 million per flank (n=24); (D) 500,000 per flank (n=20); (E) 15,000 per cheek (n=4); (F) 5,000 per cheek (n=5). (G-H) No tumor rejection was observed in other commonly used HNC cell lines. (G) B4B8 cells were injected into WT Balb/c mice at 1 million per cheek (n=9). (H) LY2 cells were injected into WT Balb/c mice at 1 million per cheek (n=15).

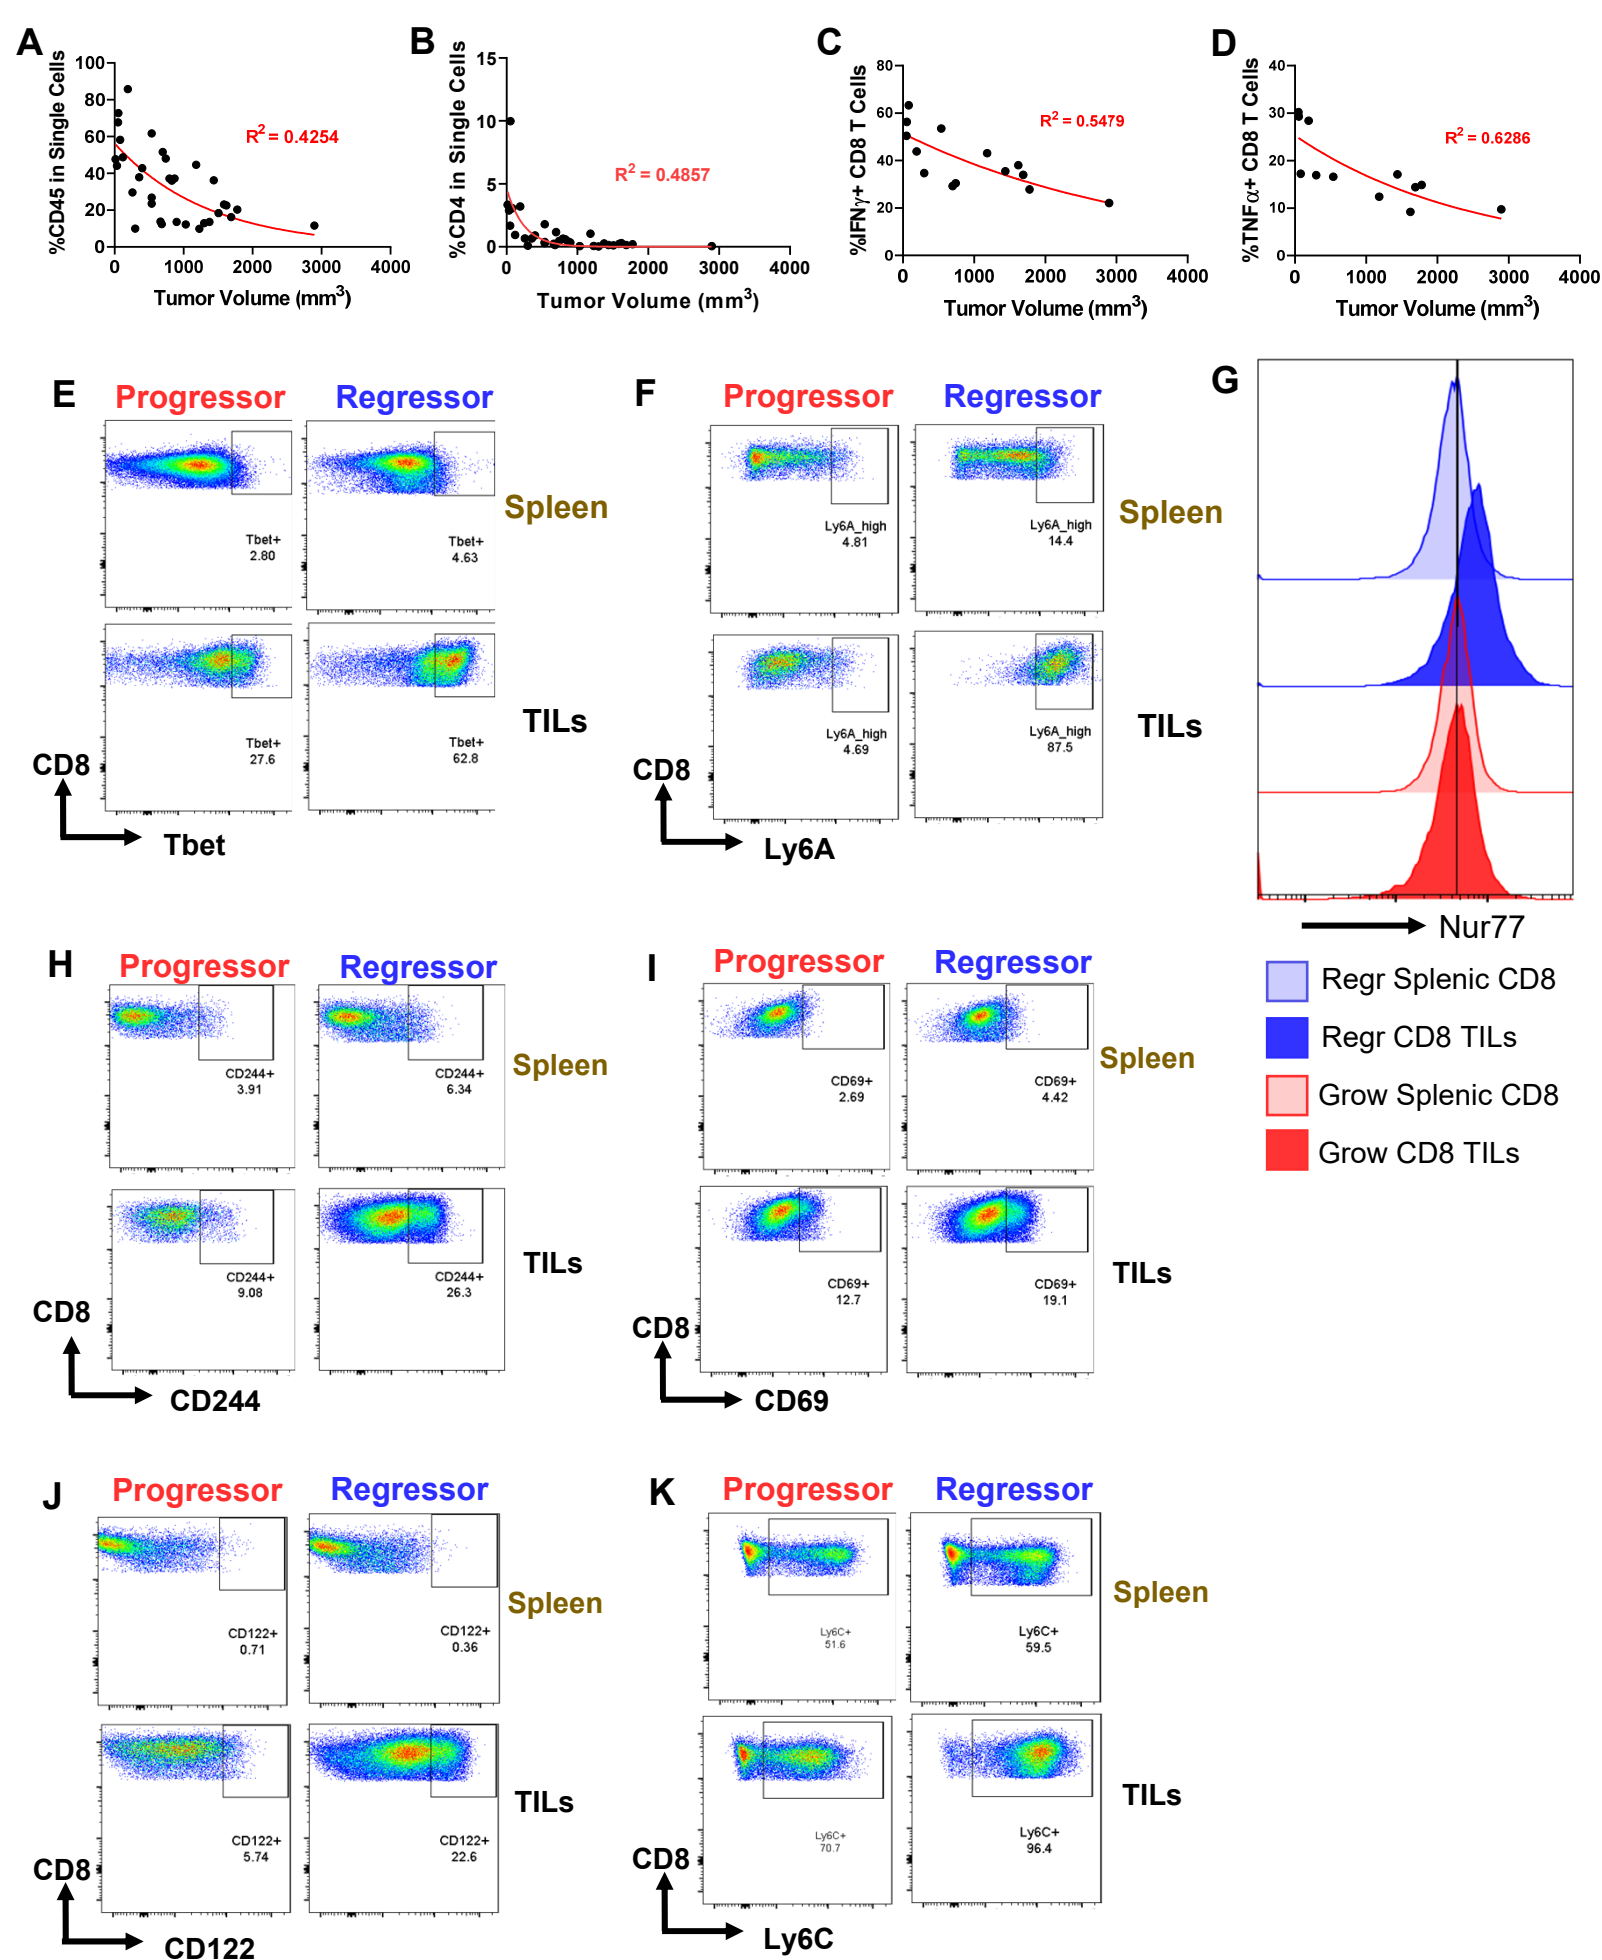

Supplemental Figure 2A-K

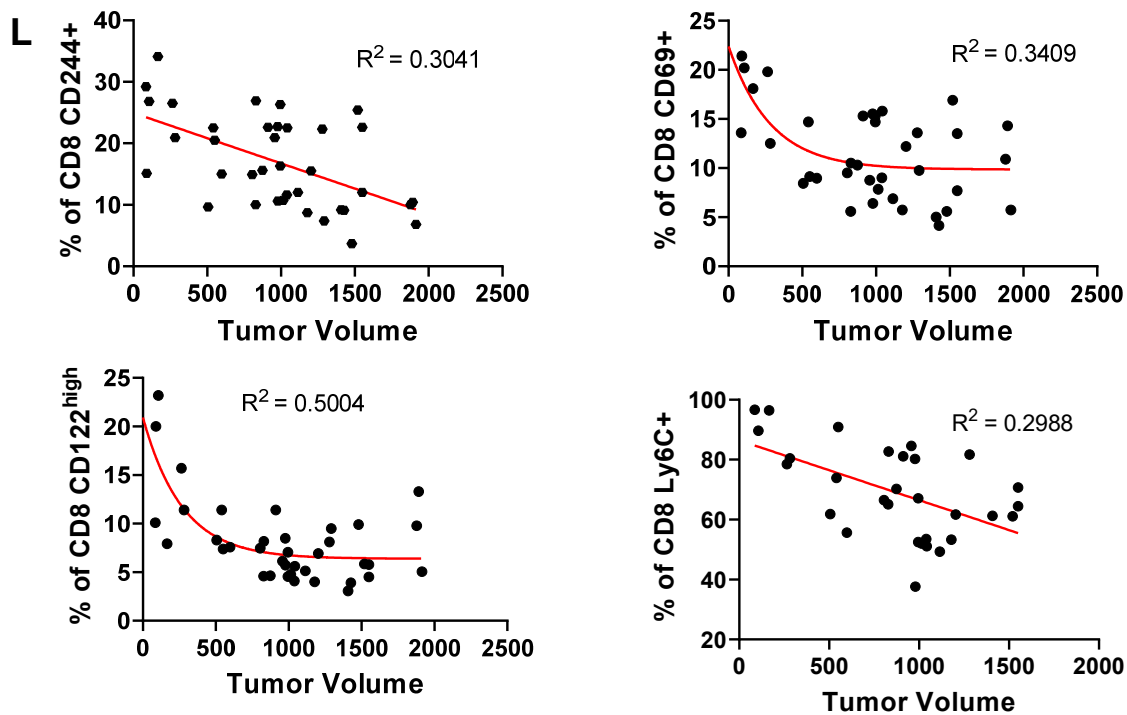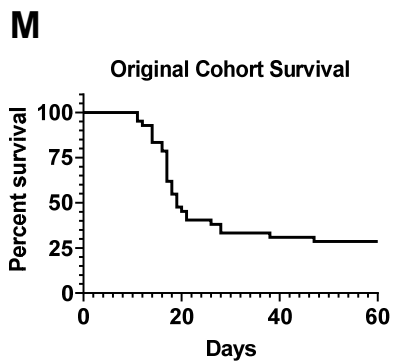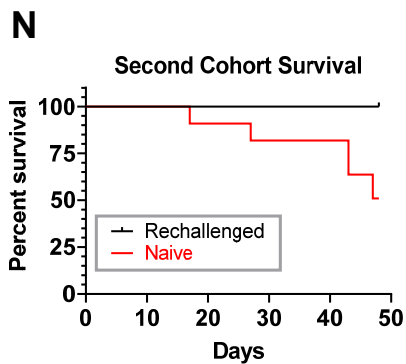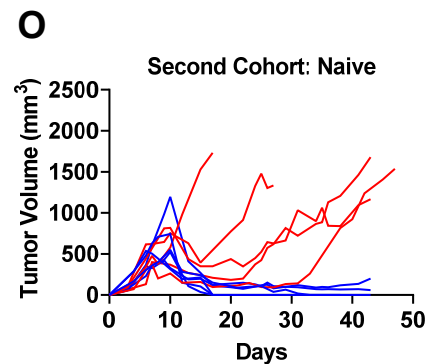

**Supplemental Figure 2: Tumor regression correlates to immune response.** A223 tumors were implanted in WTB6 mice, measured for tumor volume (mm<sup>3</sup>) and then analyzed by flow cytometry. **(A)** Correlation of the percentage of CD45<sup>+</sup> cells in the single cell gate with tumor volume (mm<sup>3</sup>) ( $R^2 = 0.4254$ ) (n=34; pooled from 8 independent experiments). **(B)** Correlation of the percentage of CD4<sup>+</sup> cells in the single cell gate with tumor volume ( $R^2 = 0.4857$ ) (n=34; 8 independent experiments). **(C)** Correlation of the percentage of IFN $\gamma$ <sup>+</sup> cells within CD8<sup>+</sup> T cells with tumor volume ( $R^2 = 0.5479$ ) (n=14, 3 independent experiments). **(D)** Correlation of the percentage of TNF $\alpha$ <sup>+</sup> cells within CD8<sup>+</sup> T cells with tumor volume ( $R^2 = 0.6286$ ) (n=12, 2 independent experiments). **(E-K)** Several activation markers are differentially expressed in CD8 TILs in Progressors vs. Regressors. Splenic CD8 T cells from Progressors or Regressors are shown as controls. A higher percentage of Regressor CD8 TILs express T-bet **(E)**, Ly6A **(F)**, CD244 **(H)**, CD69 **(I)**, CD122 **(J)**, Ly6C **(K)** than Progressor TILs or splenic controls. **(G)** Regressor CD8 TILs express a higher level of Nur77 than Progressor TILs or splenic controls. **(L)** A223 tumors were implanted in WT B6 mice, measured for tumor volume (mm<sup>3</sup>) and then analyzed by flow cytometry. **(L, upper left)** Correlation of the percentage of CD244<sup>+</sup> cells within CD8<sup>+</sup> cells with tumor volume (mm<sup>3</sup>) ( $R^2 = 0.3041$ ) (n=37; pooled from 2 independent experiments). **(L, upper right)** Correlation of the percentage of CD69<sup>+</sup> cells within CD8<sup>+</sup> cells with tumor volume ( $R^2 = 0.3409$ ) (n=37; pooled from 2 independent experiments). **(L, lower left)** Correlation of the percentage of CD122<sup>high</sup> cells within CD8<sup>+</sup> cells with tumor volume ( $R^2 = 0.5004$ ) (n=37; pooled from 2 independent experiments). **(L, lower right)** Correlation of the percentage of Ly6C<sup>+</sup> cells within CD8<sup>+</sup> cells with tumor volume ( $R^2 = 0.2988$ ) (n=30; 1 independent experiment). **(M)** Survival of WT B6 mice upon injection with A223 tumors ("Original Cohort") (n=38) shows the typical ~25% survival. **(N and O)** Regressors develop memory responses against A223 tumors. **(N)** 9 regressors from the original cohort were challenged again with A223 tumors ("Second Cohort") and all of the rechallenged mice survived (100%). In parallel, age-matched naïve WT B6 mice were challenged with A223 tumors for the first time (n=11); however, only about 50% of naïve mice survived. **(O)** Tumor growth curves of naïve mice (n=11) as shown in (N).



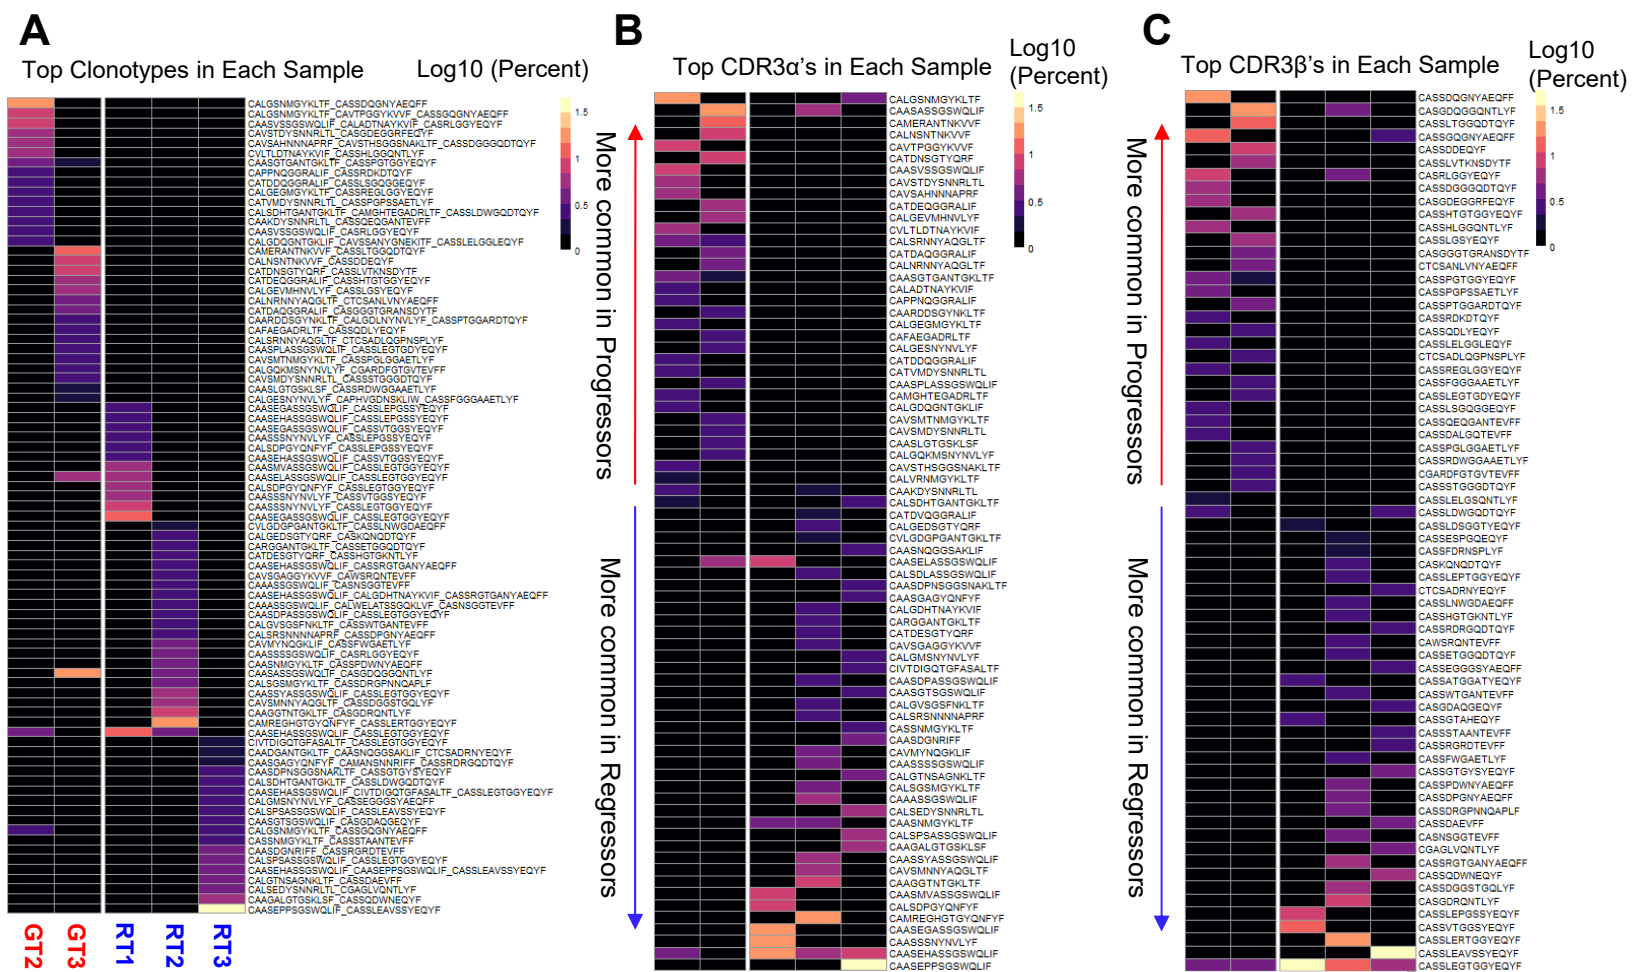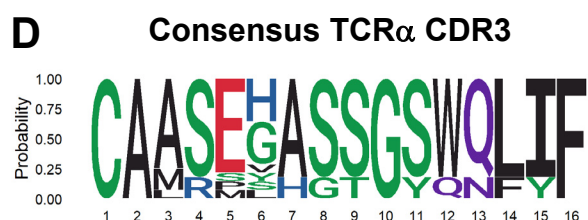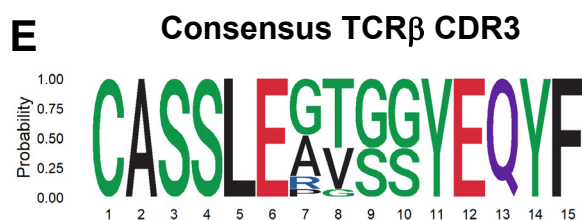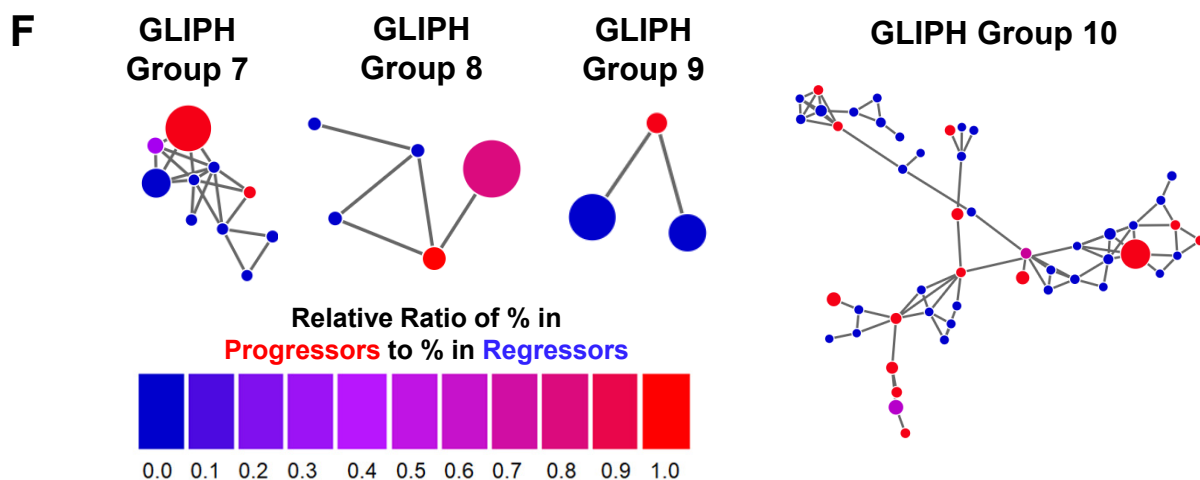

**G**

|                       | In Progressors | In Regressors |
|-----------------------|----------------|---------------|
| Progressor Clonotypes | 31             | 3             |
| Regressor Clonotypes  | 5              | 44            |

\*\*\*\*

Supplemental Figure 3

**Supplemental Figure 3: Top TCR clonotypes and TCR specificity groups appear to be mutually exclusive between regressing and progressing TILs.** (A) Heatmap of top TCR clonotypes that are >1% in any given sequenced TIL sample (including GT2, GT3, RT1, RT2 and RT3), sorted by descending abundance (%) in GT3, then descending abundance in GT2, then ascending abundance in RT1, then ascending abundance in RT2, then ascending abundance in RT3. Heatmap cells are colored according to the log10 of the percent in each sample. Many commonly used TCR clonotypes are only detected in one recipient mouse with only a few exceptions, indicating highly individualized anti-tumor immune responses. (B) Heatmap of top TCR $\alpha$  CDR3 sequences (CDR3 $\alpha$ ) (>1% in any given sample), sorted by average abundance in progressing TILs vs. average abundance in regressing TILs. (C) Heatmap of top TCR $\beta$  CDR3 sequences (CDR3 $\beta$ ) (>1% in any given sample), sorted by average abundance in progressing TILs vs. average abundance in regressing TILs. (D and E) CDR3 sequences for TCR $\alpha$  and TCR $\beta$  regressor clonotypes were analyzed for a consensus sequence. Regressor CDR3 $\alpha$  sequences ranged from 12 to 16 amino acids (AAs), with 16 AAs being the most abundant. Regressor CDR3 $\beta$  sequences ranged from 12 to 16 AAs, with 15 AAs being the most abundant. (D) Consensus AA sequence for top TCR $\alpha$  CDR3 regions in Regressors (>1% in a regressor sample) (AA-length=16). Unique sequences were scaled by their abundance in samples (ex: a sequence averaging in 5% of samples would be counted 5 times, while a sequence averaging in 20% of samples would be counted 20 times) and plotted using ggseqlogo. (E) Consensus AA sequence for top TCR $\beta$  CDR3 regions in Regressors (>1% in a regressor sample) (AA-length=15). Unique sequences were scaled by their abundance in samples and plotted using ggseqlogo. (F) Network plots of GLIPH Groups 7, 8, 9, and 10. Each node represents a TCR $\beta$  CDR3 AA sequence, and each line represents a global similarity to another CDR3 sequence. Node sizes represent overall abundance in samples and nodes are colored based on the relative ratio between their percent in progressing samples (**red**) versus their percent in regressing samples (**blue**) where purple is a sequence shared between progressing and regressing samples. Relative ratio is calculated as (% in Progressors)/(% in Progressors + % in Regressors). (G) Statistical analysis for progressor vs regressor clonotypes. Clonotypes were designated as Progressor Clonotypes or Regressor Clonotypes by overall abundance in either group (See Figure 4C for more common in Progressors vs more common in Regressors). The difference between two groups was analyzed by Fisher's Exact Test to evaluate whether the clonotypes were exclusive to Progressors or Regressors or shared. 31 Progressor Clonotypes were observed in Progressors only, whereas 3 were observed also in Regressors. 44 Regressor Clonotypes were observed in Regressors only, whereas 5 were observed also in Progressors. (\*\*\*\* p<0.0001).

A

## RT1 TRA V-J Gene Usage

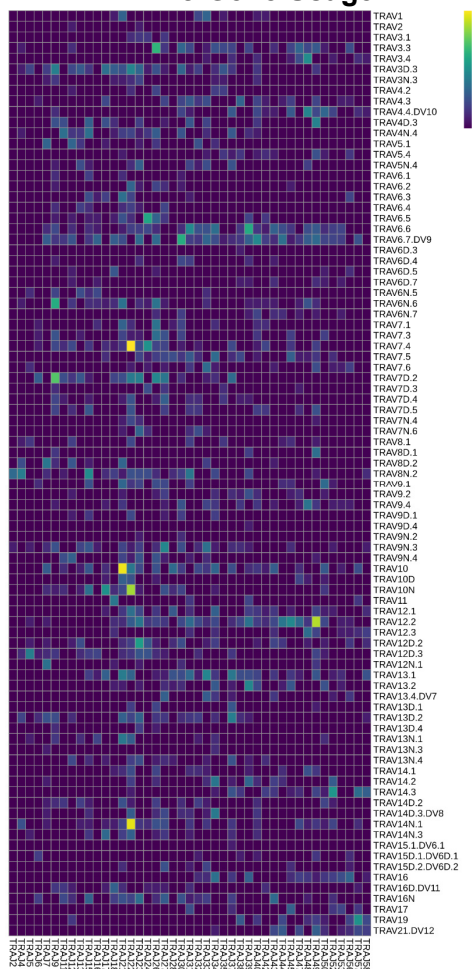

## RT2 TRA V-J Gene Usage

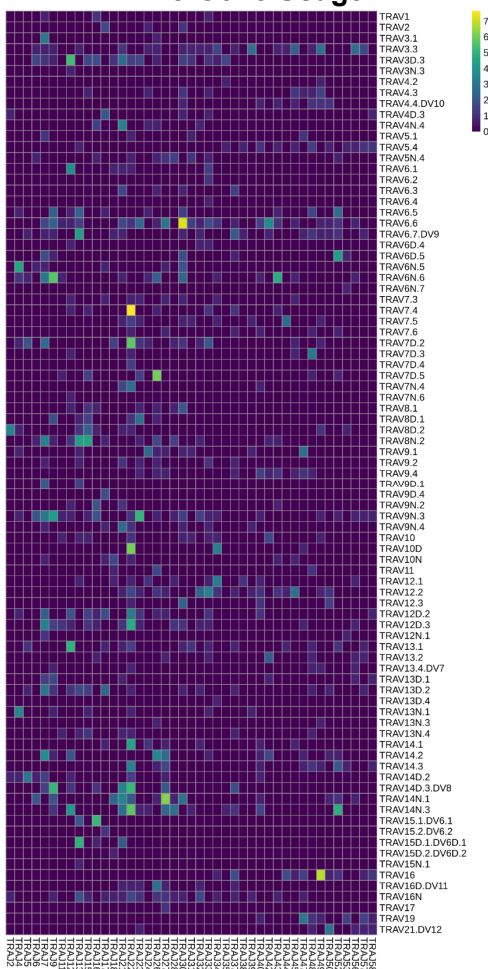

## RT3 TRA V-J Gene Usage

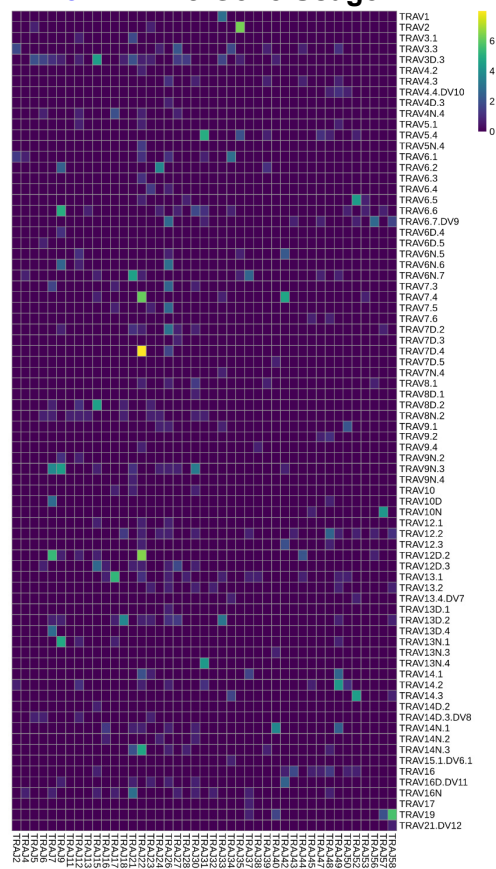

## GT2 TRA V-J Gene Usage

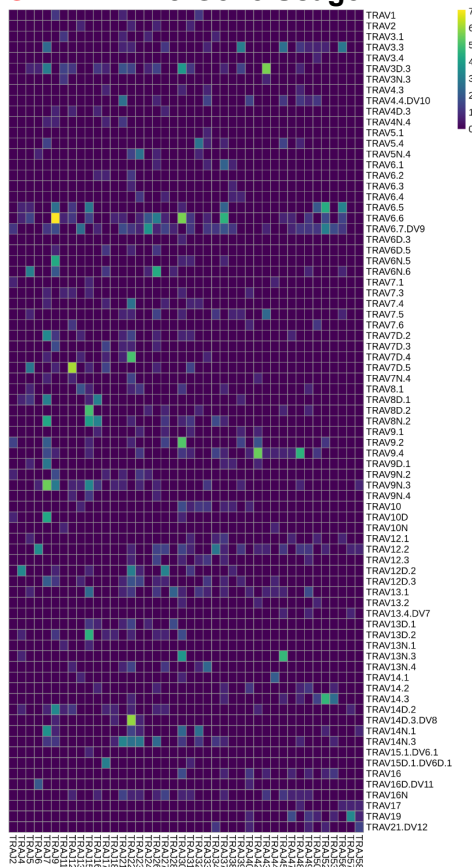

## GT3 TRA V-J Gene Usage

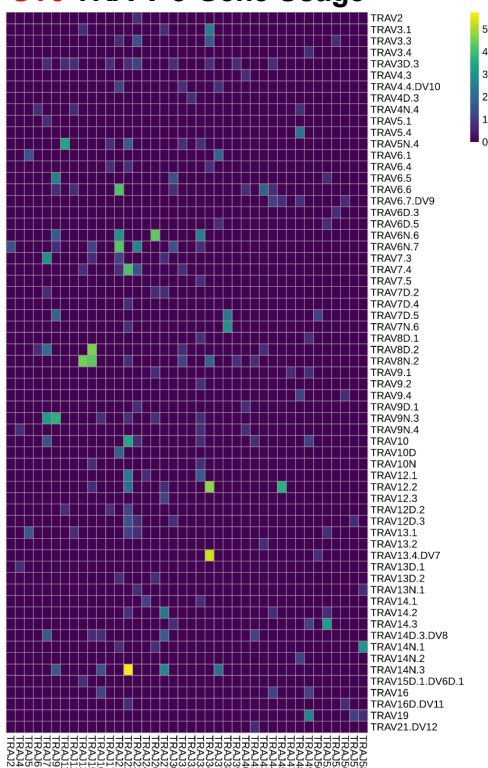

B

RS2 TRA V-J Gene Usage

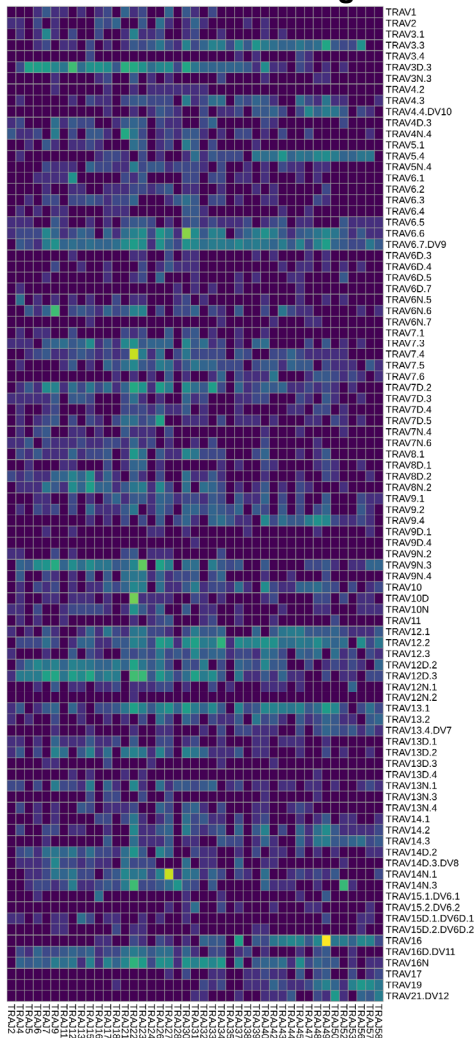

RS3 TRA V-J Gene Usage

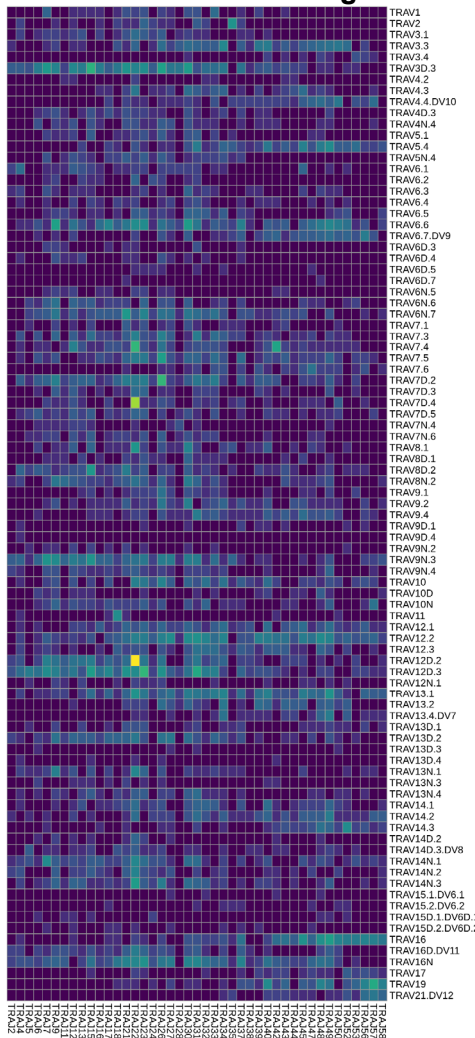

GS3 TRA V-J Gene Usage

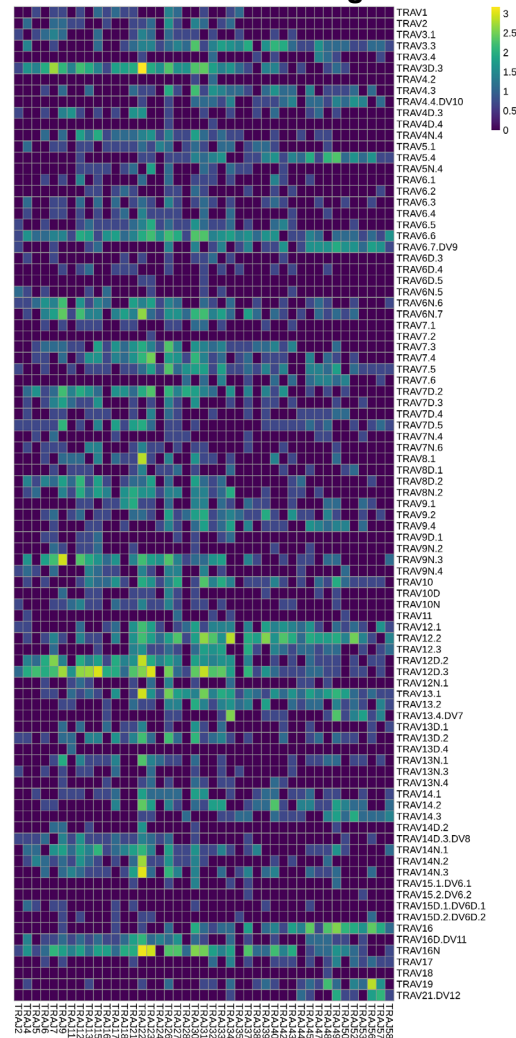

**Supplemental Figure 4: V-J gene usage in 8 samples sequenced for TCR including TIL and splenic controls. (A)** TCR $\alpha$  V-J gene usage combinations in all T cells of each TIL sample (5 in total, RT1, RT2, RT3, GT2 and GT3), colored by log(# of cells). **(B)** TCR $\alpha$  V-J gene usage combinations in all T cells of each spleen sample (3 in total, RS2, RS3 and GS3), colored by log(# of cells).



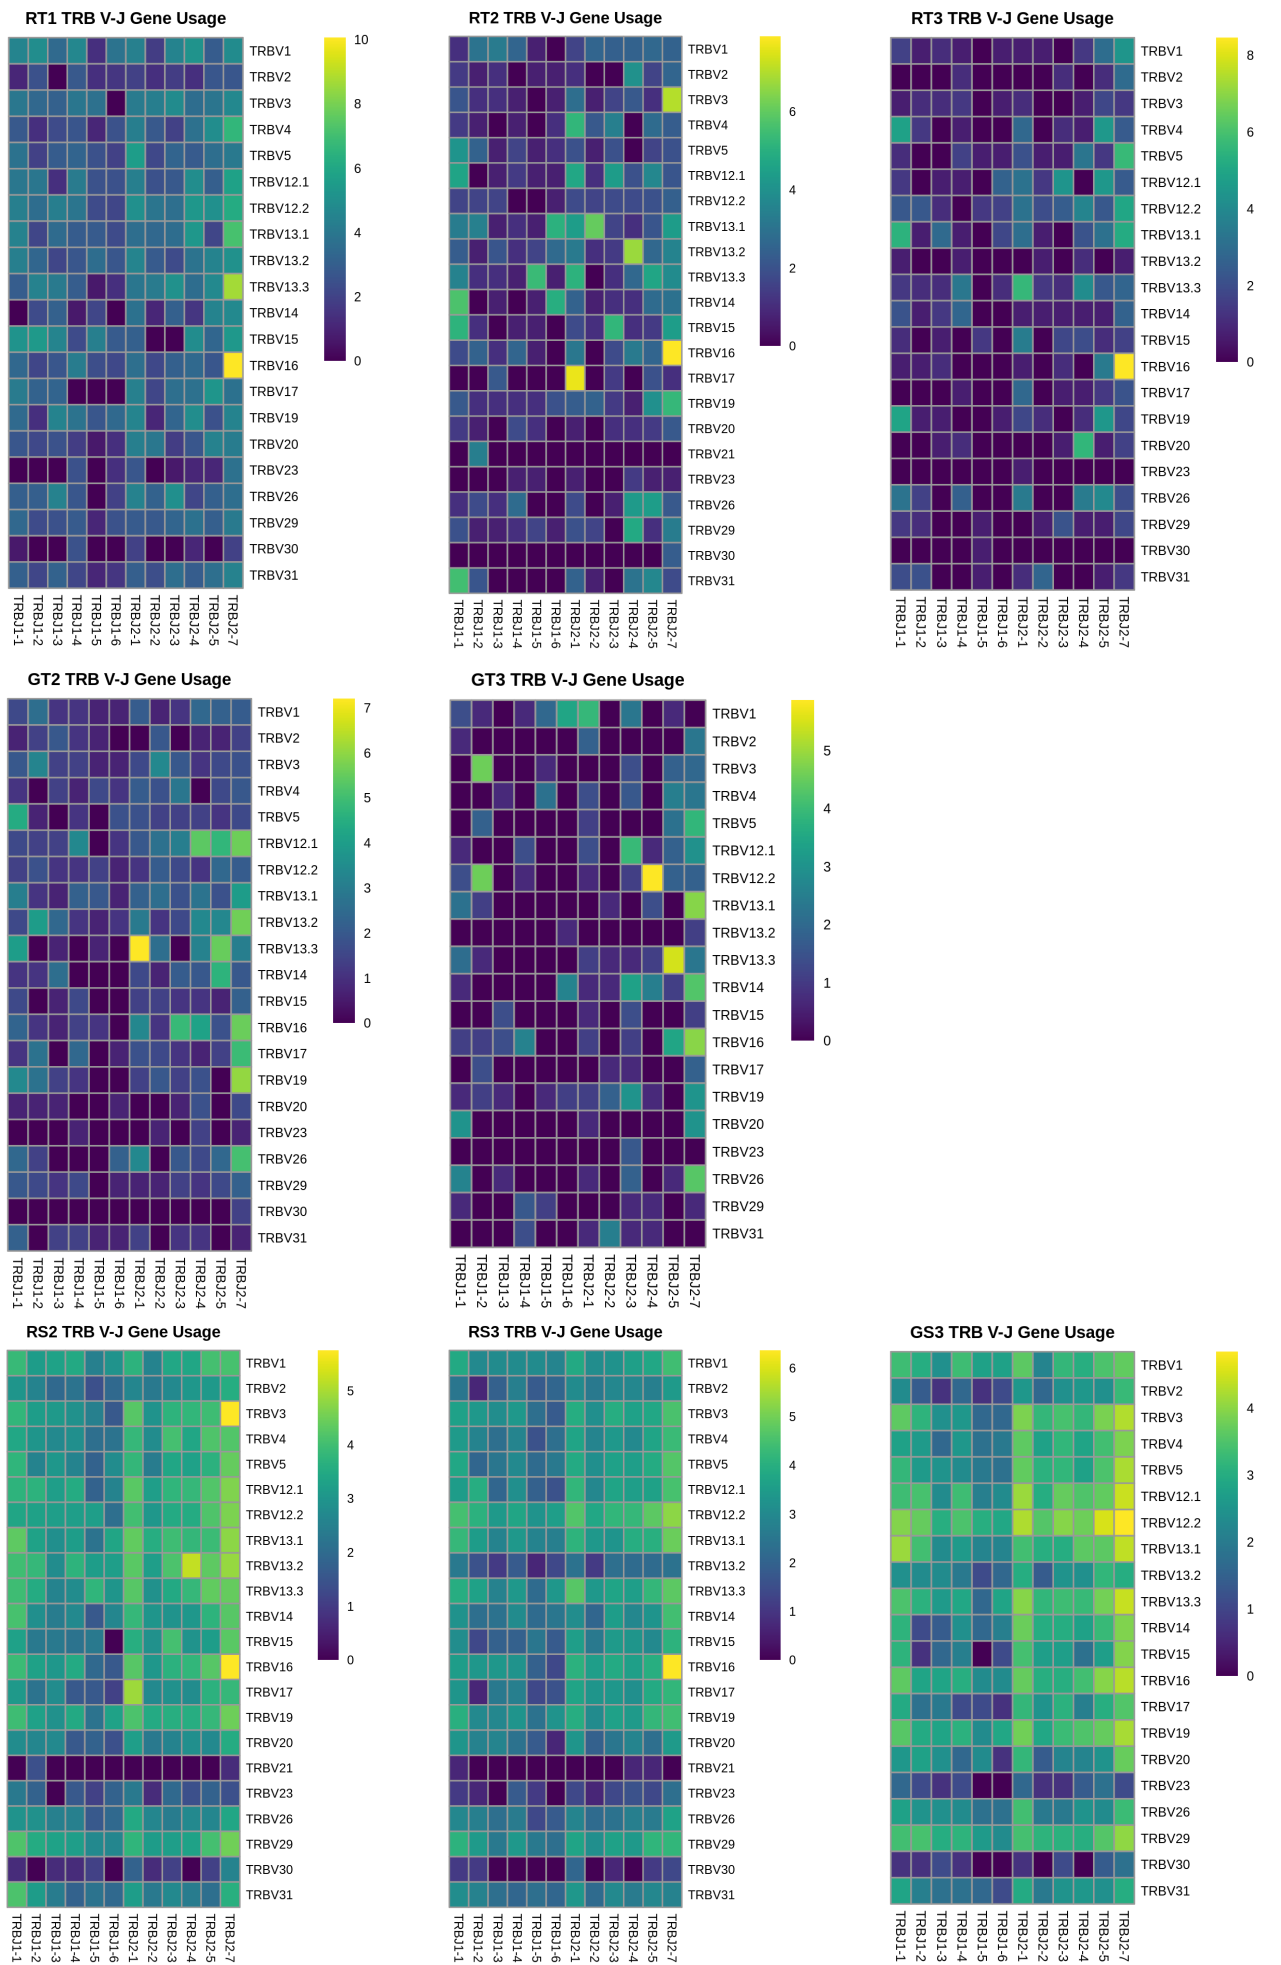

**Supplemental Figure 5: TCR $\beta$  Gene Usage in 8 Samples sequenced for TCR including 5 TIL samples and 3 splenic samples.** TCR $\beta$  V-J gene usage combinations in all T cells of each sample, colored by  $\log(\# \text{ of cells})$ .

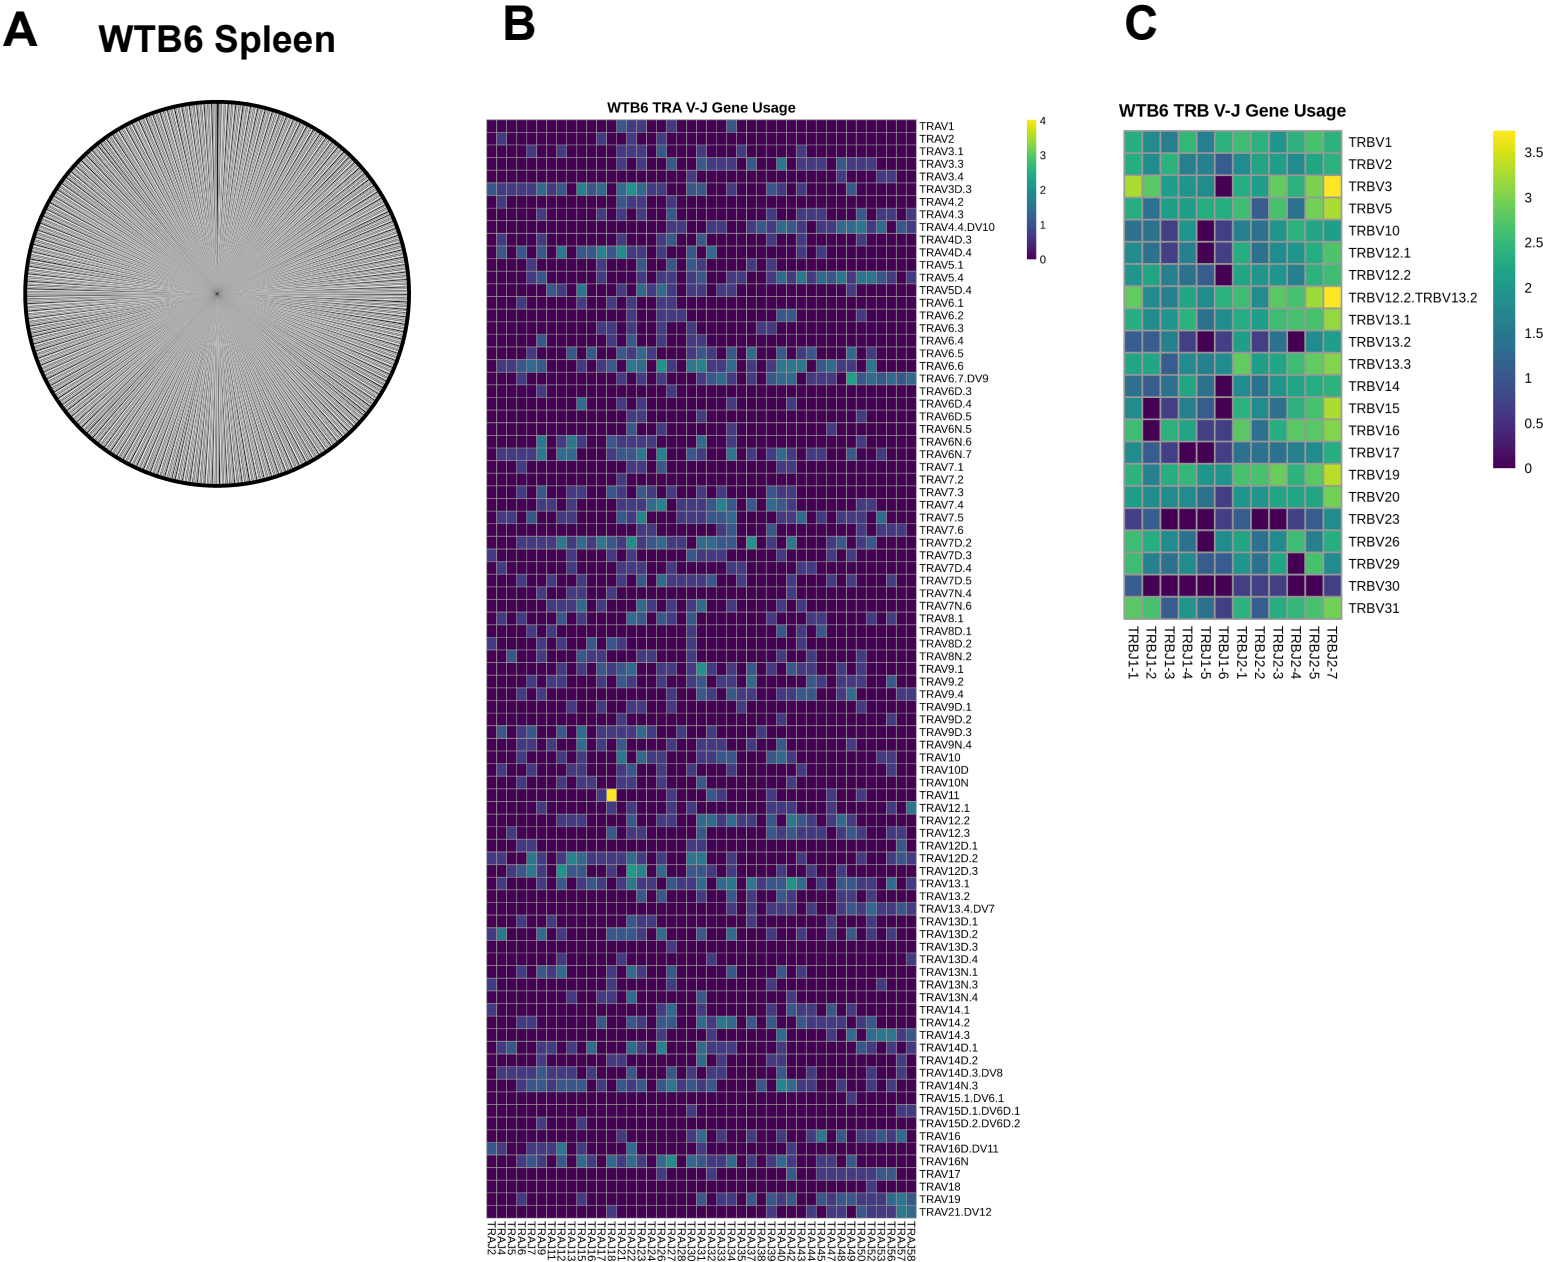

**Supplemental Figure 6: Non-Tumor Bearing WT B6 Repertoire.** Publicly available data from a non-tumor-bearing C57BL/6J mouse were downloaded from 10×Genomics, listed under the “Splenocytes from C57BL/6 mice, 10k cells (v2)” dataset. VDJ data were analyzed in the same manner as our 8 samples. **(A)** TCR clonotype distribution in 1435 T cells in a WT B6 spleen. Cells containing the same TCR (one “clonotype”) are shown as a single pie slice representing the percent of these cells in the entire sample. **(B)** TCR $\alpha$  V-J gene usage combinations in 1435 T cells in a WT B6 spleen, colored by log(# of cells). **(C)** TCR $\beta$  V-J gene usage combinations in 1435 T cells in a WT B6 spleen, colored by log(# of cells).

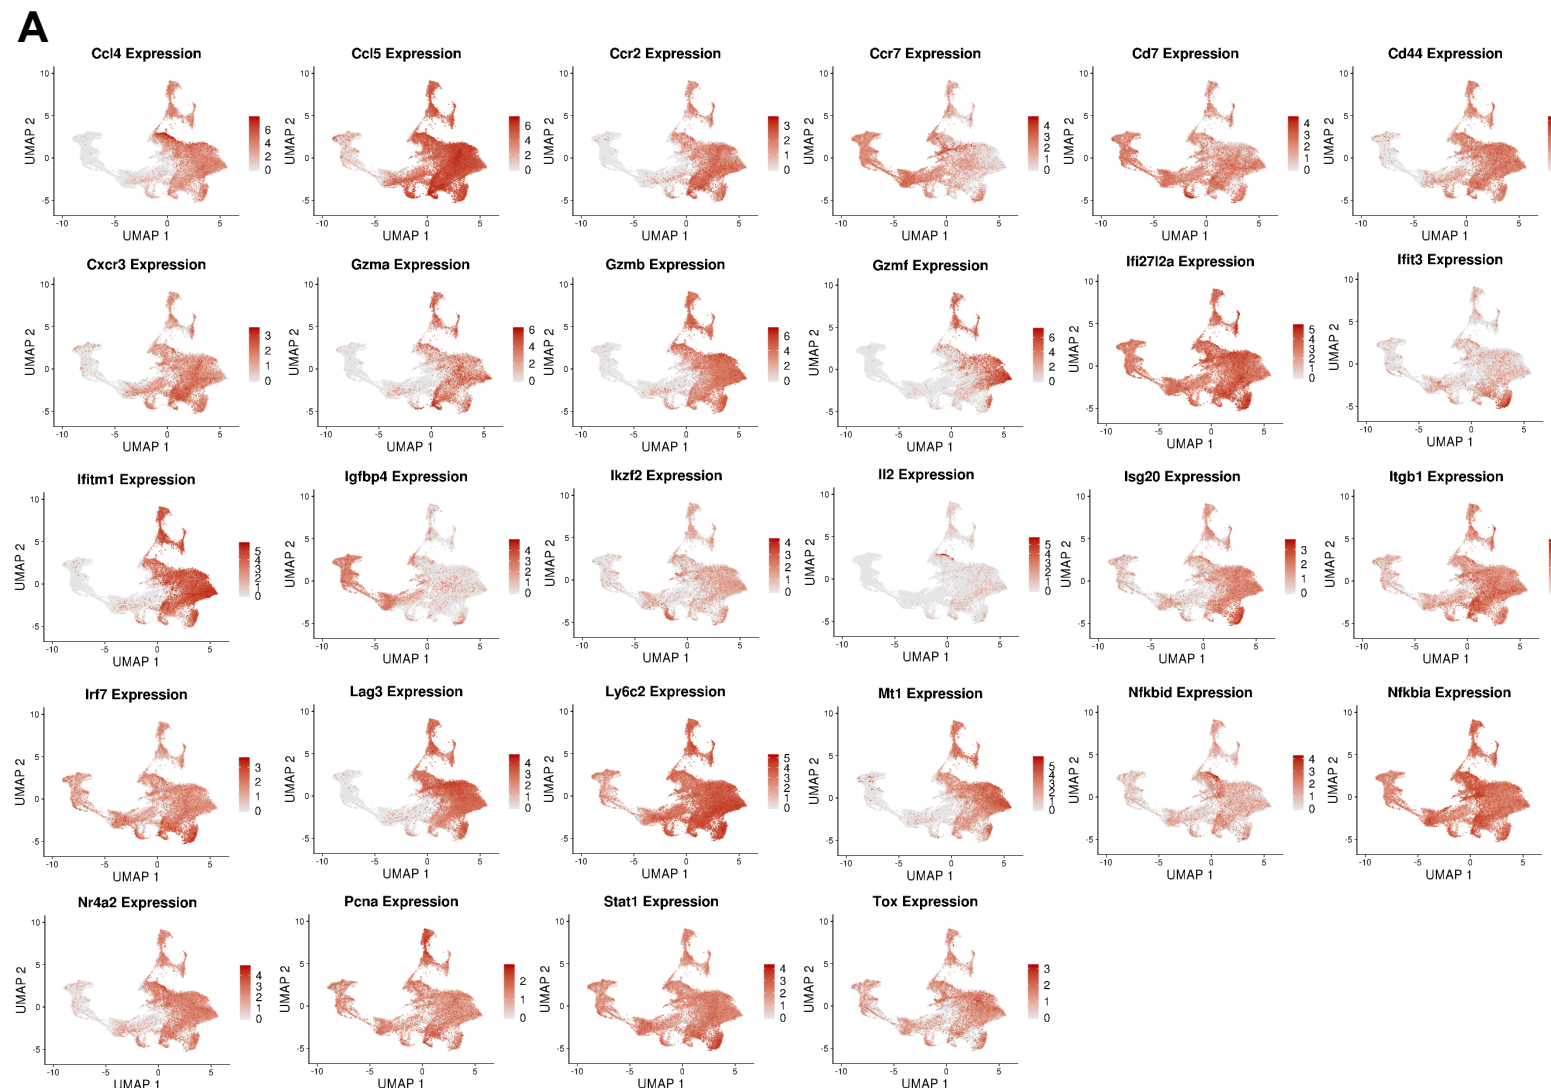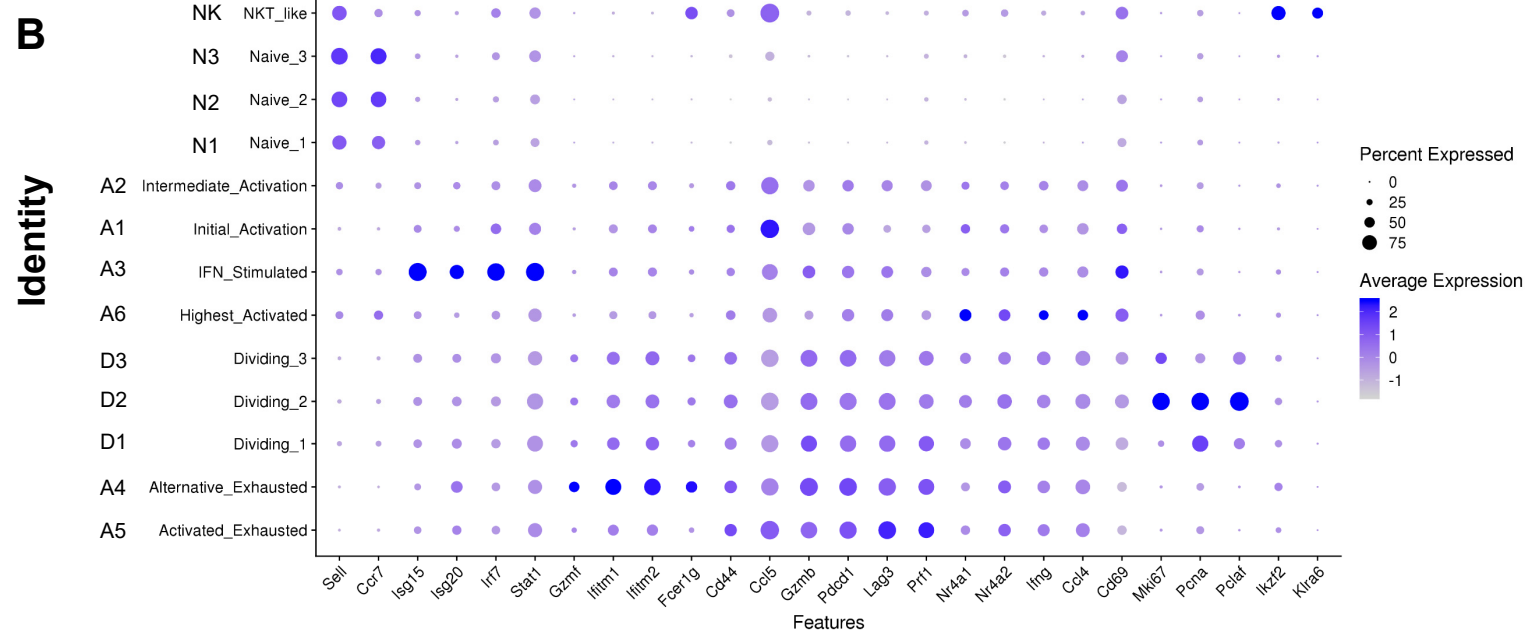

**Supplemental Figure 7A-B: Differential expression of T cell activation genes in different clusters. (A)** >41,000 cells from 9 samples (Grow1-TIL, Regr1-TIL, Grow2-TIL, Regr2-TIL, Regr2-Spln, Grow3-TIL, Regr3-TIL, Grow3-Spln, Regr2-Spln) were clustered together using UMAP, and colored based on normalized expression of a given gene (gray = little to no expression; red = high expression). 28 UMAPs were shown for 28 representative T cell activation genes. **(B)** Dot plot of representative genes defining each cluster in the UMAP.

**Supplemental Figure 7A, B**

C

## Marker Gene Expression by Cluster

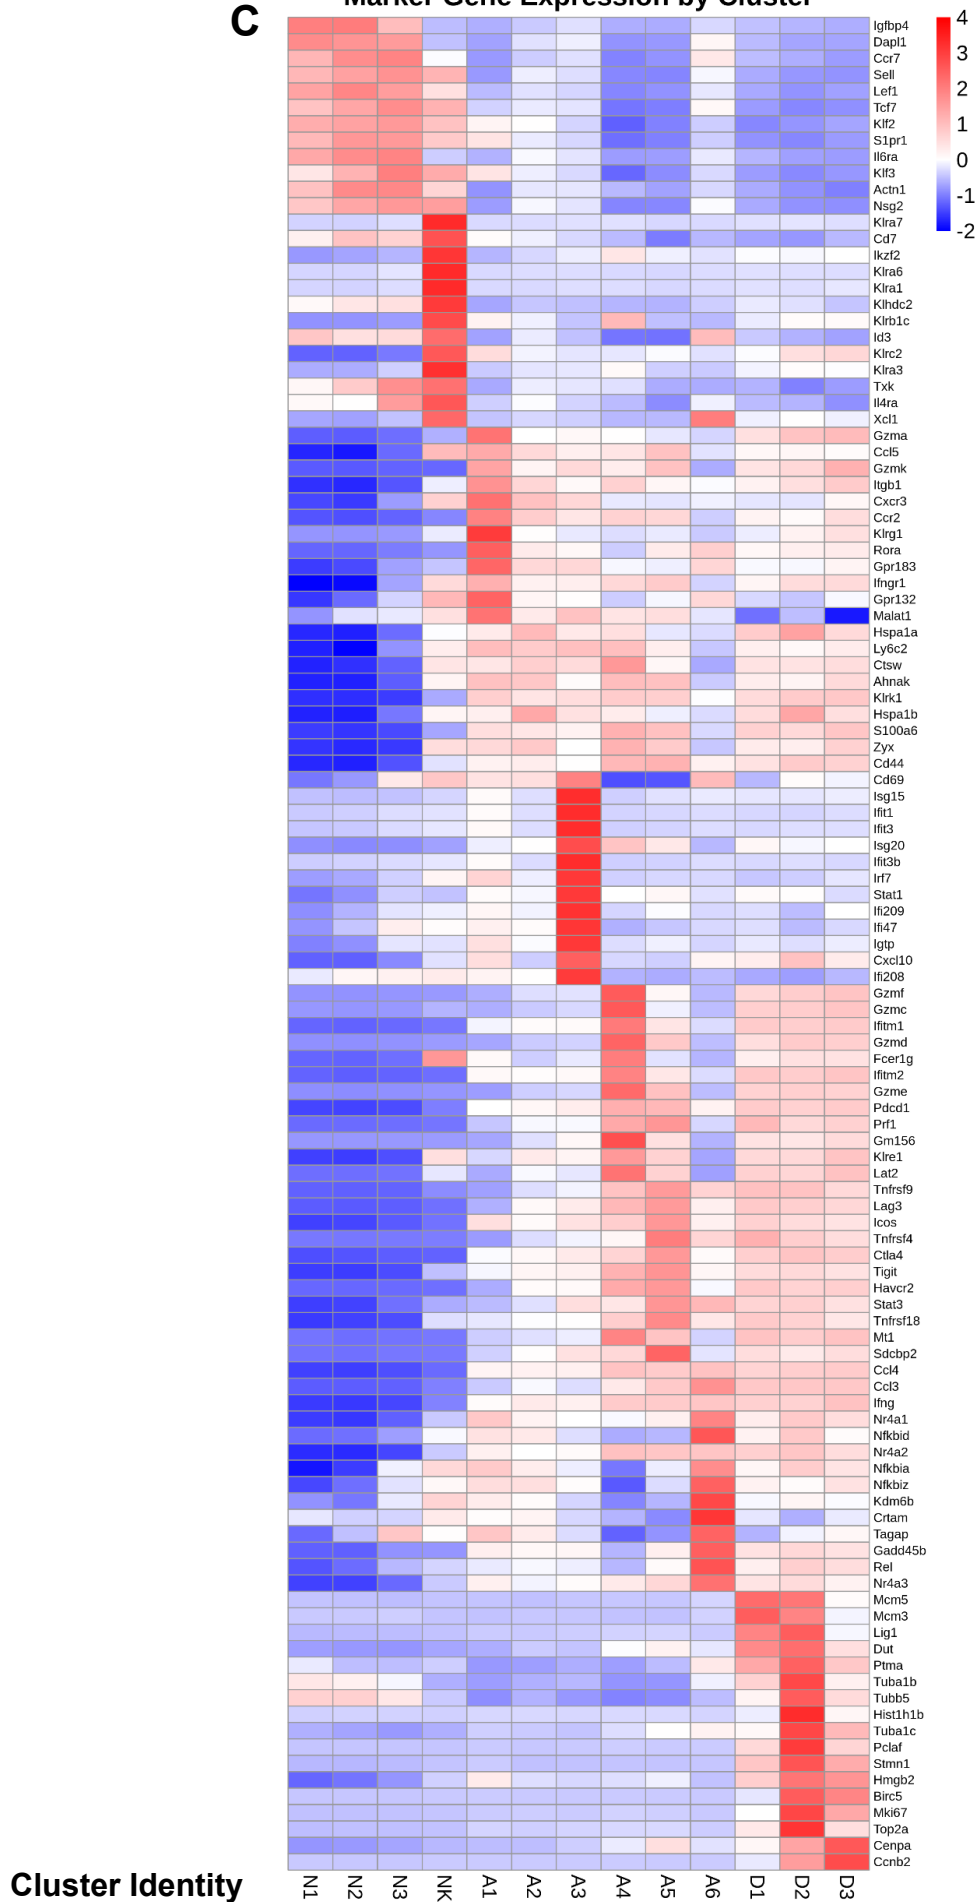

**Supplemental Figure 7C: Differential expression of T cell activation genes in different clusters. (C)** “Marker” genes for each cluster (as defined by FindMarkers in Seurat) are shown in a heatmap plotting the average expression of all cells in each cluster. Color designations are scaled by row.



**A**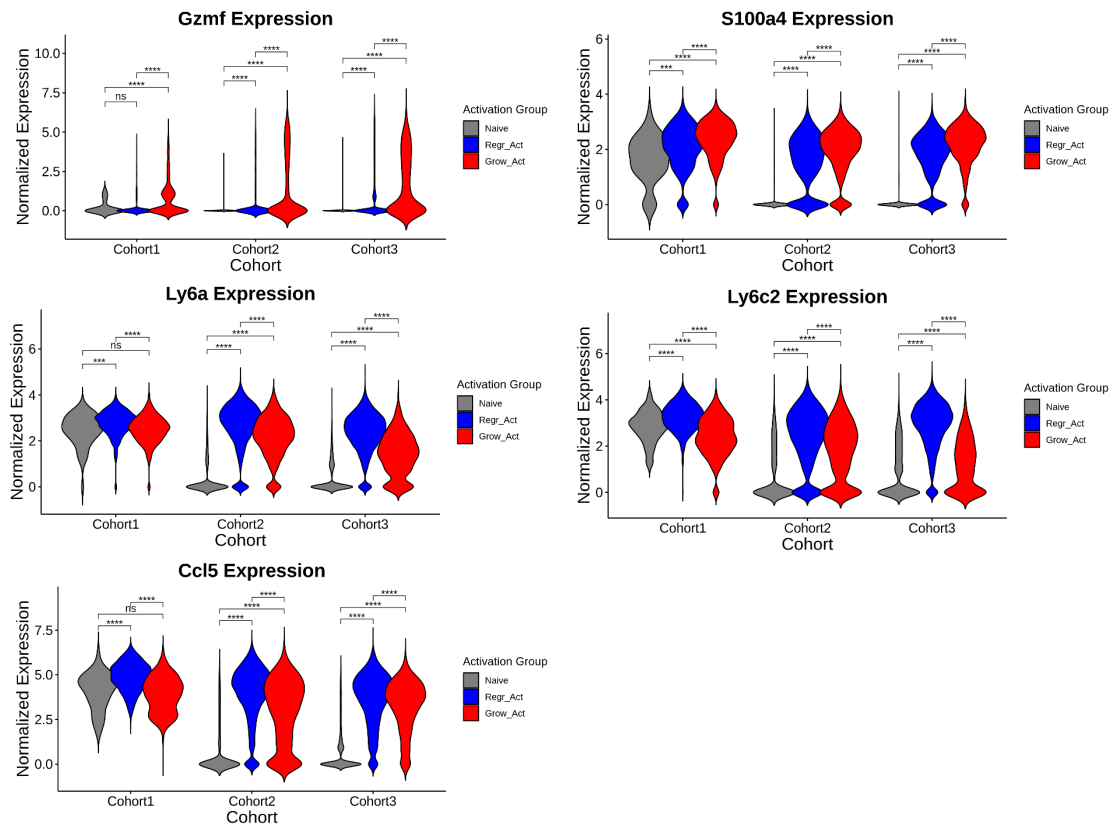**B**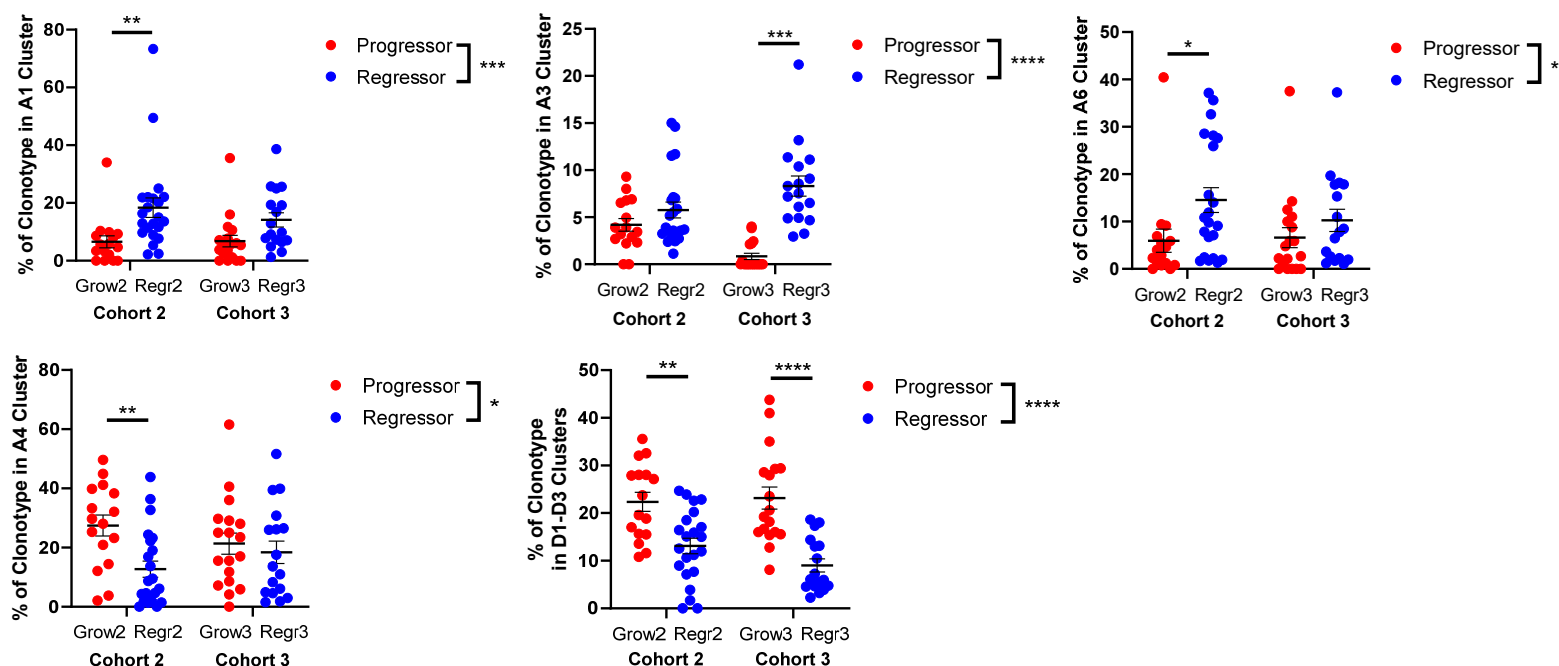

**Supplemental Figure 8A-B: Reanalysis by Cohort.** Data shown in Figures 5G and 6B were analyzed in order to account for differences between sequencing cohorts. **(A)** Gene expression violin plots from Figure 5G are alternatively shown by separating cells into their three respective sequencing cohorts (Cohort 1 = Grow1 and Regr1; Cohort 2 = Grow2 and Regr2; Cohort 3 = Grow3 and Regr3). Representative genes upregulated in growing or regressing activated TILs (residing in one of the 6 activated clusters: A1-A6) versus naïve T cells (residing in N1-N3). Grow-Act = activated clusters in growing samples; Regr-Act = activated clusters in regressing samples; Naïve = naïve clusters in all samples. Differences were evaluated using two-way ANOVA for Activation group (Regr\_Act, Grow\_Act, Naïve) and for Cohort. Variation by Activation Group, Cohort, and Interaction were all statistically significant ( $p < 0.0001$ ). Tukey's multiple comparison of means tests were conducted between each Activation group and were all statistically significant (adjusted  $p$ -value = 0). **(B)** Data from Figure 6B are alternatively shown by separating clonotypes into their respective samples (Grow2, Regr2, Grow3, Regr3) which come from two sequencing cohorts (Cohort 2 = Grow2 and Regr2; Cohort 3 = Grow3 and Regr3). Clusters that are differentially occupied by progressing and regressing clonotypes are quantified with dot plots with a black line indicating the mean. Differences were evaluated using two-way ANOVA for Progression group (Progressor vs. Regressor) and for Cohort. Variations by Progression group were statistically significant as indicated on the right. Sidak's multiple comparison tests were conducted to compare samples within each cohort, with significance indicated above. (\* $p < 0.05$ , \*\* $p < 0.01$ , \*\*\* $p < 0.001$ , \*\*\*\* $p < 0.0001$ )

**C**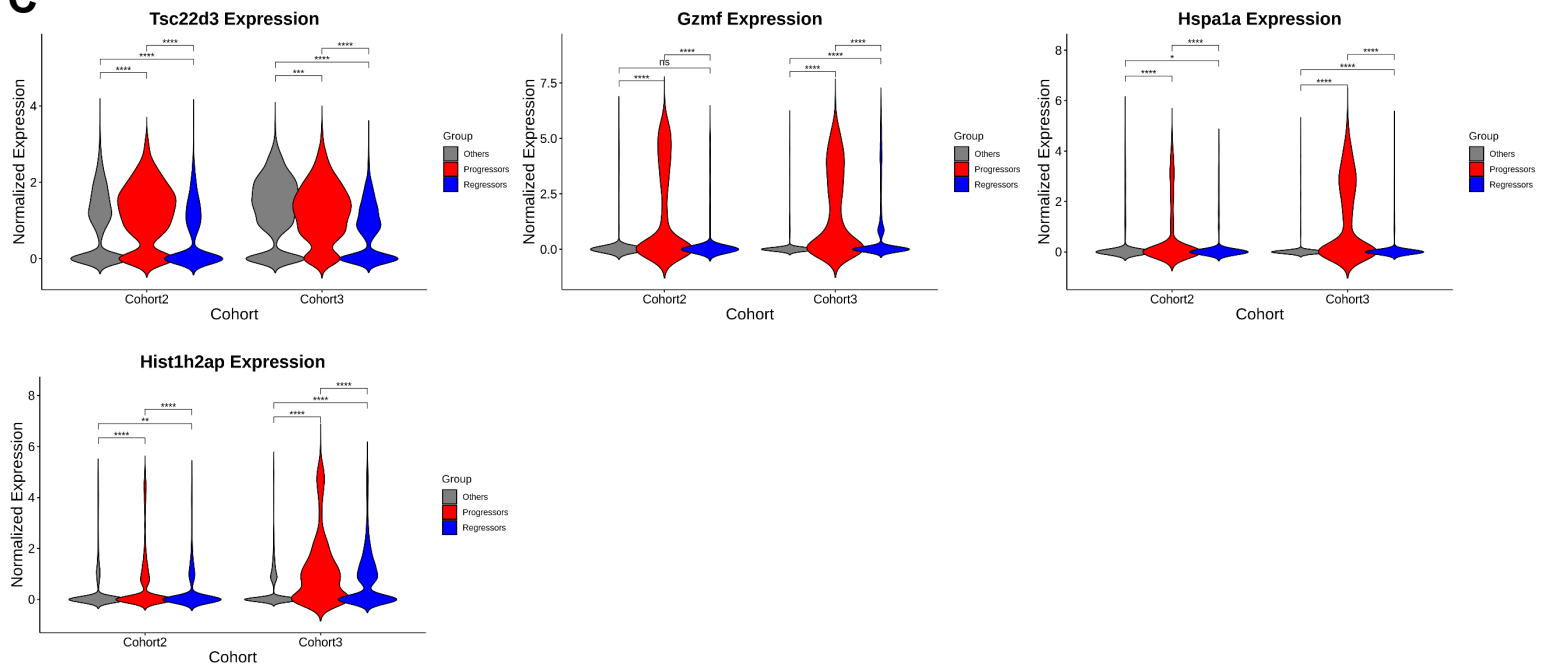**D**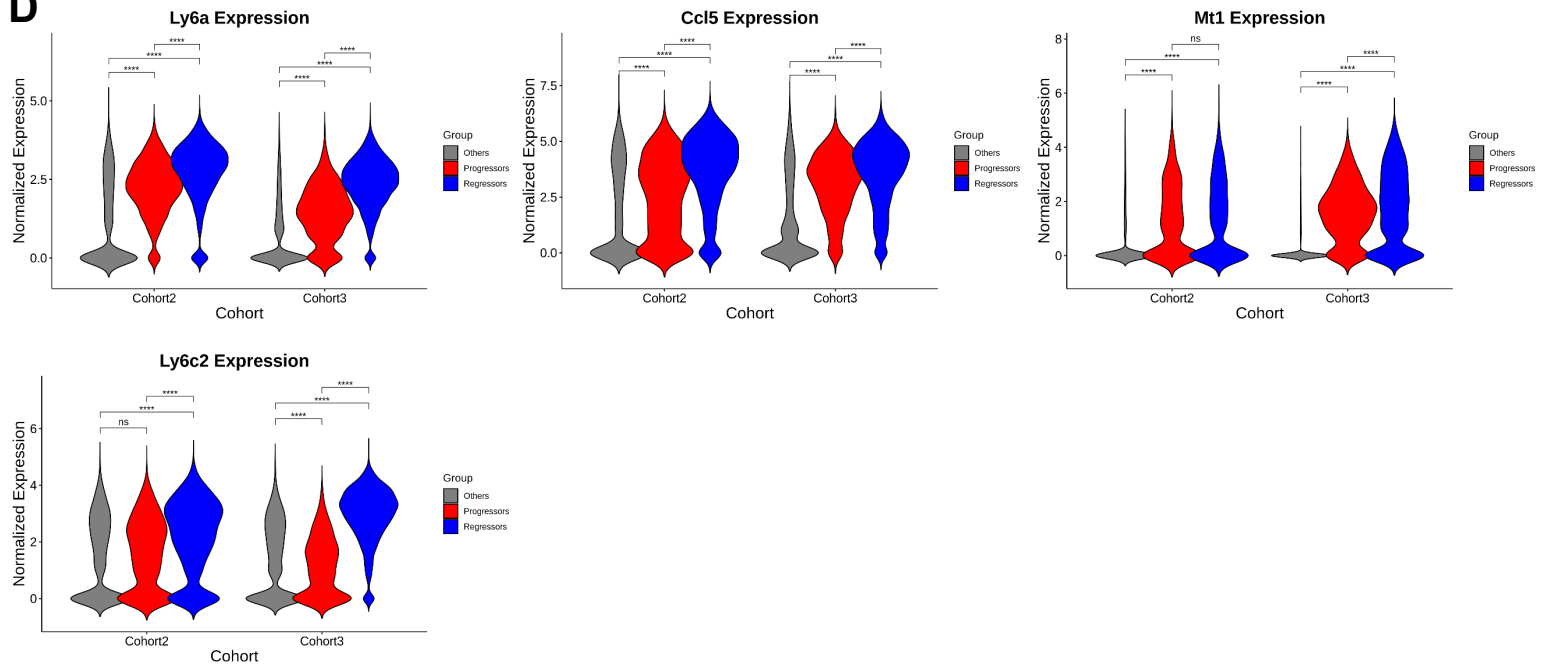

**Supplemental Figure 8C-D: Reanalysis by Cohort.** Data shown in Figures 7D and 7E are alternatively shown by separating cells of top clonotypes into their two respective sequencing cohorts (Cohort 2 = Grow2 and Regr2; Cohort 3 = Grow3 and Regr3). The normalized gene expression for all cells in each category is shown. Differences were evaluated using two-way ANOVA for Progression group (Progressor vs. Regressor) and for Cohort. **(C)** Violin plots of genes more highly expressed in Progressor top TCR clonotypes from Figure 7D. **(D)** Violin plots of genes more highly expressed in Regressor top TCR clonotypes from Figure 7E. Variation by Activation Group, Cohort, and Interaction were all statistically significant ( $p < 0.0001$ ). Tukey's multiple comparison of means tests were conducted between each Activation group and were all statistically significant (adjusted  $p$ -value = 0). (\* $p < 0.05$ , \*\* $p < 0.01$ , \*\*\* $p < 0.001$ , \*\*\*\* $p < 0.0001$ ).

**Supplemental Table 1. 18 samples sequenced by Single-cell TCR and Single-cell RNA sequencing.**

| Sample                      | Abbrev.      | Mouse         | Tissue | Sorted cells | Chemistry | # Cells |
|-----------------------------|--------------|---------------|--------|--------------|-----------|---------|
| Regressing TIL #1 (3')      | Regr1-TIL    | Regressor #1  | Tumor  | Live         | 3'        | 1655    |
| Progressing TIL #1 (3')     | Grow1-TIL    | Progressor #1 | Tumor  | Live         | 3'        | 1790    |
| Regressing TIL #1 (5')      | Regr1-5p-TIL | Regressor #1  | Tumor  | CD8+, Live   | 5'        | 44389   |
| Regressing TIL #1 (VDJ)     | RT1          | Regressor #1  | Tumor  | CD8+, Live   | VDJ       | 22045   |
| Regressing TIL #2 (5')      | Regr2-TIL    | Regressor #2  | Tumor  | CD8+, Live   | 5'        | 7832    |
| Regressing TIL #2 (VDJ)     | RT2          | Regressor #2  | Tumor  | CD8+, Live   | VDJ       | 5634    |
| Progressing TIL #2 (5')     | Grow2-TIL    | Progressor #2 | Tumor  | CD8+, Live   | 5'        | 4262    |
| Progressing TIL #2 (VDJ)    | GT2          | Progressor #2 | Tumor  | CD8+, Live   | VDJ       | 2599    |
| Regressing Spleen #2 (5')   | Regr2-Spln   | Regressor #2  | Spleen | CD8+, Live   | 5'        | 6598    |
| Regressing Spleen #2 (VDJ)  | RS2          | Regressor #2  | Spleen | CD8+, Live   | VDJ       | 5268    |
| Regressing TIL #3 (5')      | Regr3-TIL    | Regressor #3  | Tumor  | CD8+, Live   | 5'        | 7276    |
| Regressing TIL #3 (VDJ)     | RT3          | Regressor #3  | Tumor  | CD8+, Live   | VDJ       | 5940    |
| Progressing TIL #3 (5')     | Grow3-TIL    | Progressor #3 | Tumor  | CD8+, Live   | 5'        | 1727    |
| Progressing TIL #3 (VDJ)    | GT3          | Progressor #3 | Tumor  | CD8+, Live   | VDJ       | 1548    |
| Regressing Spleen #3 (5')   | Regr3-Spln   | Regressor #3  | Spleen | CD8+, Live   | 5'        | 6020    |
| Regressing Spleen #3 (VDJ)  | RS3          | Regressor #3  | Spleen | CD8+, Live   | VDJ       | 5096    |
| Progressing Spleen #3 (5')  | Grow3-Spln   | Progressor #3 | Spleen | CD8+, Live   | 5'        | 3939    |
| Progressing Spleen #3 (VDJ) | GS3          | Progressor #3 | Spleen | CD8+, Live   | VDJ       | 3847    |

**Supplemental Table 1: 18 Samples Sequenced by Single-Cell-RNA Sequencing.** 3 progressing tumors and 3 regressing tumors were removed from 6 mice, tumors were digested, and cells were flow-sorted. The first cohort of mouse tumors (Regressor #1 and Progressor #1) were both sorted for Live, small-FSC cells to capture bulk tumor-infiltrating cells and each was subjected to 3' library prep, and then separately, Regressor #1 was also sorted for Live CD8+ cells and subjected to 5' library prep for RNA expression and TCR VDJ. The second cohort of mouse tumors (Regressor #2 and Progressor #2) were both sorted for Live CD8+ cells and subjected to 5' library prep for RNA expression and TCR VDJ. The spleen from Regressor #2 was also sorted for Live CD8+ cells and subjected to 5' library prep for RNA expression and TCR VDJ. The third cohort of mouse tumors (Regressor #3 and Progressor #3) were both sorted for Live CD8+ cells and subjected to 5' library prep for RNA expression and TCR VDJ. The spleens from Regressor #3 and Progressor #3 were also sorted for Live CD8+ cells and subjected to 5' library prep for RNA expression and TCR VDJ. To fit with the subsequent cohorts' samples of CD8 T cells, the 3' RNA-sequenced samples (Regr1-TIL, Grow1-TIL) were filtered during analysis to include only CD8 T cell clusters. The 5'/TCR sample from Regressor #1 was overloaded with cells (~50,000) so while ~22,000 cells had complete TCR VDJ regions sequenced, the RNA expression data was not deep enough and deemed not useful for analysis. # Cells in the last column represents the number of cells used after filtering for CD8 T cells with appropriate RNA expression (see details in Methods).

Supplemental Table 2: Detailed clonotype information for top 10 TCR clones in each sample.

| Sample    | TCRα CDR3          | TCRαV         | TCRαJ  | TCRβ CDR3         | TCRβV    | TCRβD | TCRβJ   | TCRα CDR3 #2      | TCRαV #2 | TCRαJ #2 | % of Sample |
|-----------|--------------------|---------------|--------|-------------------|----------|-------|---------|-------------------|----------|----------|-------------|
| Regr1-TIL | CAASEHASSGSWQLIF   | TRAV7-4       | TRAJ22 | CASSLEGTGGYEQYF   | TRBV16   | TRBD2 | TRBJ2-7 | NA                | NA       | NA       | 5.9         |
|           | CAASEGASSGSWQLIF   | TRAV14N-1     | TRAJ22 | CASSLEGTGGYEQYF   | TRBV16   | TRBD2 | TRBJ2-7 | NA                | NA       | NA       | 4.4         |
|           | CAASSSNYNVLYF      | TRAV10        | TRAJ21 | CASSLEGTGGYEQYF   | TRBV16   | TRBD2 | TRBJ2-7 | NA                | NA       | NA       | 4.1         |
|           | CAASSSNYNVLYF      | TRAV10        | TRAJ21 | CASSVTGGSYEQYF    | TRBV13-3 | TRBD2 | TRBJ2-7 | NA                | NA       | NA       | 4           |
|           | CAASEGASSGSWQLIF   | TRAV14N-1     | TRAJ22 | CASSLEGTGGYEQYF   | TRBV16   | TRBD2 | TRBJ2-7 | NA                | NA       | NA       | 3.7         |
|           | CAASSSNYNVLYF      | TRAV10        | TRAJ21 | CASSLEGTGGYEQYF   | TRBV16   | TRBD2 | TRBJ2-7 | NA                | NA       | NA       | 2.6         |
|           | CAASEHASSGSWQLIF   | TRAV7-4       | TRAJ22 | CASSLEGTGGYEQYF   | TRBV16   | TRBD2 | TRBJ2-7 | NA                | NA       | NA       | 2.4         |
|           | CAASMVASSGSWQLIF   | TRAV10N       | TRAJ22 | CASSLEGTGGYEQYF   | TRBV16   | TRBD2 | TRBJ2-7 | NA                | NA       | NA       | 2.2         |
|           | CALSDPGYQNFYF      | TRAV12-2      | TRAJ49 | CASSLEGTGGYEQYF   | TRBV16   | TRBD2 | TRBJ2-7 | NA                | NA       | NA       | 2           |
|           | CAASEHASSGSWQLIF   | TRAV7-4       | TRAJ22 | CASSVTGGSYEQYF    | TRBV13-3 | TRBD2 | TRBJ2-7 | NA                | NA       | NA       | 1.8         |
| Regr2-TIL | CAMREGHGTGYQNFYF   | TRAV16        | TRAJ49 | CASSLRTGGYEQYF    | TRBV3    | TRBD2 | TRBJ2-7 | NA                | NA       | NA       | 13.3        |
|           | CAAGGTNTGKLTf      | TRAV14N-1     | TRAJ27 | CASGDRQNTLYF      | TRBV13-2 | None  | TRBJ2-4 | NA                | NA       | NA       | 6.3         |
|           | CAVSMNNYAQGLTF     | TRAV7D-5      | TRAJ26 | CASSDGGSTGQLYF    | TRBV13-1 | TRBD1 | TRBJ2-2 | NA                | NA       | NA       | 5.3         |
|           | CAASSYASSGSWQLIF   | TRAV10D       | TRAJ22 | CASSLEGTGGYEQYF   | TRBV16   | TRBD2 | TRBJ2-7 | NA                | NA       | NA       | 4.3         |
|           | CALSGSMGYKLTf      | TRAV6N-6      | TRAJ9  | CASSDRGPNNAQPLF   | TRBV13-3 | TRBD1 | TRBJ1-5 | NA                | NA       | NA       | 2.4         |
|           | CAASNMGYKLTf       | TRAV14D-3-DV8 | TRAJ9  | CASSPDWNYAEQFF    | TRBV4    | TRBD2 | TRBJ2-1 | NA                | NA       | NA       | 2.2         |
|           | CAASSSSGSWQLIF     | TRAV14D-3-DV8 | TRAJ22 | CASRLGGYEQYF      | TRBV19   | TRBD2 | TRBJ2-7 | NA                | NA       | NA       | 2.1         |
|           | CAVMYNQGKLIF       | TRAV9N-3      | TRAJ23 | CASSFWGAETLYF     | TRBV15   | TRBD2 | TRBJ2-3 | NA                | NA       | NA       | 2.1         |
|           | CAASEHASSGSWQLIF   | TRAV7-4       | TRAJ22 | CASSLEGTGGYEQYF   | TRBV16   | TRBD1 | TRBJ2-7 | NA                | NA       | NA       | 2.1         |
|           | CALSRSNNNNAPRF     | TRAV6N-6      | TRAJ43 | CASSDPGNYAEQFF    | TRBV13-3 | None  | TRBJ2-1 | NA                | NA       | NA       | 2           |
| Regr3-TIL | CAASEPPSGSWQLIF    | TRAV7D-4      | TRAJ22 | CASSLEAVSSYEQYF   | TRBV16   | None  | TRBJ2-7 | NA                | NA       | NA       | 42.1        |
|           | CAAGALGTGSKLSF     | TRAV19        | TRAJ58 | CASSQDWNEQYF      | TRBV5    | None  | TRBJ2-7 | NA                | NA       | NA       | 4.8         |
|           | CALSEDYSNNRLTL     | TRAV12D-2     | TRAJ7  | CGAGLVQNTLYF      | TRBV20   | None  | TRBJ2-4 | NA                | NA       | NA       | 3.4         |
|           | CALGTNSAGNKLTf     | TRAV13-1      | TRAJ17 | CASSDAEVEFf       | TRBV13-1 | None  | TRBJ1-1 | NA                | NA       | NA       | 3.2         |
|           | CAASEHASSGSWQLIF   | TRAV7D-4      | TRAJ22 | CASSLEAVSSYEQYF   | TRBV16   | None  | TRBJ2-7 | CAASEPPSGSWQLIF   | TRAV7D-4 | TRAJ22   | 2.8         |
|           | CALSPASSGSWQLIF    | TRAV12D-2     | TRAJ22 | CASSLEGTGGYEQYF   | TRBV16   | None  | TRBJ2-7 | NA                | NA       | NA       | 2.8         |
|           | CAASDGNRIFF        | TRAV5-4       | TRAJ31 | CASSRGRDTEVFF     | TRBV19   | None  | TRBJ1-1 | NA                | NA       | NA       | 2.2         |
|           | CASSNMGYKLTf       | TRAV13N-1     | TRAJ9  | CASSSTAANTEVFF    | TRBV4    | None  | TRBJ1-1 | NA                | NA       | NA       | 2           |
|           | CALGSNMGYKLTf      | TRAV6-6       | TRAJ9  | CASSGQGNYAEQFF    | TRBV13-3 | None  | TRBJ2-1 | NA                | NA       | NA       | 1.9         |
|           | CAASGTSGSWQLIF     | TRAV14N-3     | TRAJ22 | CASGDAQGEQYF      | TRBV12-2 | None  | TRBJ2-7 | NA                | NA       | NA       | 1.8         |
| Grow2-TIL | CALGSNMGYKLTf      | TRAV6-6       | TRAJ9  | CASSDQGNYAEQFF    | TRBV13-3 | TRBD1 | TRBJ2-1 | NA                | NA       | NA       | 15.4        |
|           | CALGSNMGYKLTf      | TRAV6-6       | TRAJ9  | CASSGQGNYAEQFF    | TRBV13-3 | TRBD1 | TRBJ2-1 | CAVTPGGYKVVf      | TRAV7D-5 | TRAJ12   | 7.2         |
|           | CAASVSSGSWQLIF     | TRAV14D-3-DV8 | TRAJ22 | CASRLGGYEQYF      | TRBV19   | TRBD2 | TRBJ2-7 | CALADTNAYKVIF     | TRAV6-6  | TRAJ30   | 5.9         |
|           | CAVSTDYSNNRLTL     | TRAV9N-3      | TRAJ7  | CASGDEGGRFEQYF    | TRBV13-2 | TRBD2 | TRBJ2-7 | NA                | NA       | NA       | 5.0         |
|           | CAVSAHNNNAPRF      | TRAV3D-3      | TRAJ43 | CASSDGGGQDTQYF    | TRBV13-3 | TRBD2 | TRBJ2-5 | CAVSTHSGGSNAKLTF  | TRAV9-4  | TRAJ42   | 4.8         |
|           | CVLTLDTNAYKVIF     | TRAV9-2       | TRAJ30 | CASSHLGGQNTLYF    | TRBV12-1 | TRBD2 | TRBJ2-4 | NA                | NA       | NA       | 3.9         |
|           | CAASEHASSGSWQLIF   | TRAV7D-4      | TRAJ22 | CASSLEGTGGYEQYF   | TRBV16   | TRBD1 | TRBJ2-7 | NA                | NA       | NA       | 2.5         |
|           | CAPPNQGGRALIF      | TRAV13D-2     | TRAJ15 | CASSRDKDTQYF      | TRBV14   | None  | TRBJ2-5 | NA                | NA       | NA       | 1.8         |
|           | CATDDQGGRALIF      | TRAV8D-2      | TRAJ15 | CASSLSGGGGEQYF    | TRBV26   | TRBD1 | TRBJ2-7 | NA                | NA       | NA       | 1.6         |
|           | CAASGTGANTGKLTf    | TRAV14-3      | TRAJ52 | CASSPGTGGYEQYF    | TRBV12-1 | TRBD1 | TRBJ2-7 | NA                | NA       | NA       | 1.5         |
| Grow3-TIL | CAASASSGSWQLIF     | TRAV14N-3     | TRAJ22 | CASGDQGGQNTLYF    | TRBV12-2 | None  | TRBJ2-4 | NA                | NA       | NA       | 18.7        |
|           | CAMERANTNKVVf      | TRAV13-4-DV7  | TRAJ34 | CASSLTGGQDTQYF    | TRBV13-3 | None  | TRBJ2-5 | NA                | NA       | NA       | 11.1        |
|           | CALNSNTNKVVf       | TRAV12-2      | TRAJ34 | CASSDDEQYF        | TRBV13-1 | None  | TRBJ2-7 | NA                | NA       | NA       | 7.6         |
|           | CATDYSGTYQRF       | TRAV8N-2      | TRAJ13 | CASSLVTKNSDYTF    | TRBV3    | None  | TRBJ1-2 | NA                | NA       | NA       | 5.9         |
|           | CATDEQGGRALIF      | TRAV8N-2      | TRAJ15 | CASSHTGTGGYEQYF   | TRBV26   | None  | TRBJ2-7 | NA                | NA       | NA       | 4.2         |
|           | CALGEVMHNVLYF      | TRAV6-6       | TRAJ21 | CASSLGSYEQYF      | TRBV14   | None  | TRBJ2-7 | NA                | NA       | NA       | 4.2         |
|           | CAASELASSGSWQLIF   | TRAV7-4       | TRAJ22 | CASSLEGTGGYEQYF   | TRBV16   | None  | TRBJ2-7 | NA                | NA       | NA       | 3.6         |
|           | CALNRNNYAQGLTF     | TRAV6N-6      | TRAJ26 | CTCSANLVNYAEQFF   | TRBV1    | None  | TRBJ2-1 | NA                | NA       | NA       | 3           |
|           | CATDAQGGRALIF      | TRAV8D-2      | TRAJ15 | CASGGGTGRANSDYTF  | TRBV12-2 | None  | TRBJ1-2 | NA                | NA       | NA       | 2.8         |
|           | CAARDDSGYNKLTf     | TRAV5N-4      | TRAJ11 | CASSPTGGARDTQYF   | TRBV13-3 | None  | TRBJ2-5 | CALGDLNYNVLYF     | TRAV6N-7 | TRAJ21   | 1.9         |
| Regr2-Spl | CAMREGHGTGYQNFYF   | TRAV16        | TRAJ49 | CASSLRTGGYEQYF    | TRBV3    | TRBD2 | TRBJ2-7 | NA                | NA       | NA       | 2.12        |
|           | CAAGGTNTGKLTf      | TRAV14N-1     | TRAJ27 | CASGDRQNTLYF      | TRBV13-2 | None  | TRBJ2-4 | NA                | NA       | NA       | 1.32        |
|           | CAASSYASSGSWQLIF   | TRAV10D       | TRAJ22 | CASSLEGTGGYEQYF   | TRBV16   | TRBD2 | TRBJ2-7 | NA                | NA       | NA       | 0.71        |
|           | CAVMYNQGKLIF       | TRAV9N-3      | TRAJ23 | CASSFWGAETLYF     | TRBV15   | TRBD2 | TRBJ2-3 | NA                | NA       | NA       | 0.48        |
|           | CARGGANTGKLTf      | TRAV14N-3     | TRAJ52 | CASSETGGQDTQYF    | TRBV13-3 | TRBD2 | TRBJ2-5 | NA                | NA       | NA       | 0.46        |
|           | CAASDPASSGSWQLIF   | TRAV7-4       | TRAJ22 | CASSLEGTGGYEQYF   | TRBV16   | TRBD2 | TRBJ2-7 | NA                | NA       | NA       | 0.32        |
|           | CALSGSMGYKLTf      | TRAV6N-6      | TRAJ9  | CASSDRGPNNAQPLF   | TRBV13-3 | TRBD1 | TRBJ1-5 | NA                | NA       | NA       | 0.27        |
|           | CAVSMNNYAQGLTF     | TRAV7D-5      | TRAJ26 | CASSDGGSTGQLYF    | TRBV13-1 | TRBD1 | TRBJ2-2 | NA                | NA       | NA       | 0.21        |
|           | CAAASSGSWQLIF      | TRAV7D-2      | TRAJ22 | CASNSGGTEVFF      | TRBV14   | TRBD1 | TRBJ1-1 | NA                | NA       | NA       | 0.16        |
|           | CAASASSGSWQLIF     | TRAV14N-3     | TRAJ22 | CASGDQGGQNTLYF    | TRBV13-2 | TRBD1 | TRBJ2-4 | NA                | NA       | NA       | 0.16        |
| Regr3-Spl | CALSPASSGSWQLIF    | TRAV12D-2     | TRAJ22 | CASSLEGTGGYEQYF   | TRBV16   | None  | TRBJ2-7 | NA                | NA       | NA       | 4.71        |
|           | CAASEPPSGSWQLIF    | TRAV7D-4      | TRAJ22 | CASSLEAVSSYEQYF   | TRBV16   | None  | TRBJ2-7 | NA                | NA       | NA       | 2.32        |
|           | CAASDPNSSGGSNAKLTF | TRAV7-4       | TRAJ42 | CASSGTGYSYEQYF    | TRBV13-1 | None  | TRBJ2-7 | NA                | NA       | NA       | 0.44        |
|           | CAASNNNYAQGLTF     | TRAV7D-2      | TRAJ26 | CASSLDWGGYEQYF    | TRBV16   | None  | TRBJ2-7 | NA                | NA       | NA       | 0.37        |
|           | CALGMSNYNVLYF      | TRAV6N-7      | TRAJ21 | CASSEGGGSYAEQFF   | TRBV13-3 | None  | TRBJ2-1 | NA                | NA       | NA       | 0.29        |
|           | CAAGHTGNYKYVf      | TRAV19        | TRAJ40 | CASSDRGEVQDTQYF   | TRBV13-3 | None  | TRBJ2-5 | NA                | NA       | NA       | 0.23        |
|           | CAASEHASSGSWQLIF   | TRAV7-4       | TRAJ22 | CASSLEGTGGYEQYF   | TRBV16   | None  | TRBJ2-7 | CIVTDIGQTGFASALTF | TRAV2    | TRAJ35   | 0.21        |
|           | CALGSNMGYKLTf      | TRAV6-6       | TRAJ9  | CASSGQGNYAEQFF    | TRBV13-3 | None  | TRBJ2-1 | NA                | NA       | NA       | 0.19        |
|           | CAASENNYAQGLTF     | TRAV7D-2      | TRAJ26 | CASSFDWGGYEQYF    | TRBV16   | None  | TRBJ2-7 | NA                | NA       | NA       | 0.15        |
|           | CASSNMGYKLTf       | TRAV13N-1     | TRAJ9  | CASSSTAANTEVFF    | TRBV4    | None  | TRBJ1-1 | NA                | NA       | NA       | 0.15        |
| Grow3-Spl | CAMERANTNKVVf      | TRAV13-4-DV7  | TRAJ34 | CASSLTGGQDTQYF    | TRBV13-3 | None  | TRBJ2-5 | NA                | NA       | NA       | 0.12        |
|           | CAASEHGNYNQGKLIF   | TRAV7-4       | TRAJ23 | CASSQGRGLGYEQYF   | TRBV5    | None  | TRBJ2-7 | NA                | NA       | NA       | 0.09        |
|           | CAASAGAASLGKLQF    | TRAV14-1      | TRAJ24 | CASSRPRDEQYF      | TRBV17   | None  | TRBJ2-7 | NA                | NA       | NA       | 0.06        |
|           | CAASATNTGKLTf      | TRAV14N-3     | TRAJ27 | CASSINWGGADEQYF   | TRBV19   | None  | TRBJ2-7 | NA                | NA       | NA       | 0.06        |
|           | CAASRDSGYNKLTf     | TRAV7D-2      | TRAJ11 | CASSQVGLGSNTGQLYF | TRBV5    | None  | TRBJ2-2 | NA                | NA       | NA       | 0.06        |
|           | CALKSNMGYKLTf      | TRAV6N-6      | TRAJ9  | CASSADARYEQYF     | TRBV13-3 | None  | TRBJ2-7 | NA                | NA       | NA       | 0.06        |
|           | CALPSSFSLKLVf      | TRAV9N-4      | TRAJ50 | CASSDEGGANSDYTF   | TRBV13-1 | None  | TRBJ1-2 | NA                | NA       | NA       | 0.06        |
|           | CAMREVNYGNEKITF    | TRAV16D-DV11  | TRAJ48 | CASRLGGRYAEQFF    | TRBV29   | None  | TRBJ2-1 | NA                | NA       | NA       | 0.06        |
|           | CATGSSNTNKVVf      | TRAV8N-2      | TRAJ34 | CASSQDPGQLNSDYTF  | TRBV5    | None  | TRBJ1-2 | NA                | NA       | NA       | 0.06        |
|           | CAVRENYGSSGNKLIF   | TRAV3-4       | TRAJ32 | CASSLDRGEVFF      | TRBV16   | None  | TRBJ1-1 | NA                | NA       | NA       | 0.06        |

Supplemental Table 2. Detailed clonotype information for top 10 TCR clones in each sample. CD8 T cells from each sample were grouped into clones by identical nucleotide sequence of the CDR3 regions of TCRα and TCRβ chains. The top 10 TCR clones by abundance in each sample are shown, with their corresponding CDR3 AA sequences, V, D, J gene usage, and percent (% = the number of cells in each clone / the number of total cells sequenced for a given sample). Occasionally, some clones contain two TCRα chains, which is plausible since allelic exclusion does not operate efficiently for the TCRα chain.



**Supplemental Table 3: Shared TCR clonotypes in different TIL samples.**

| Clonotype (TCR $\alpha$ _TCR $\beta$ CDR3) | Shared Clonotype # | n.Regr1 | n.Grow2 | n.Grow3 | n.Regr2 | n.Regr3 | Samples         | #Samples |
|--------------------------------------------|--------------------|---------|---------|---------|---------|---------|-----------------|----------|
| CAASEHASSGSWQLIF_CASSLEGTGGYEQYF           | Shared Clonotype 1 | 2046    | 81      | 0       | 108     | 7       | RT1-RT2-RT3-GT2 | 4        |
| CALSDHTGANTGKLTF_CASSLDWGQDTQYF            |                    |         | 2       | 1       | 6       | 66      | RT2-RT3-GT2-GT3 | 4        |
| CAVSMNMGYKLTFCASSLGLGGAETLYF               |                    |         | 7       | 13      | 33      | 0       | RT2-GT2-GT3     | 3        |
| CAASEPPSGSWQLIF_CASSLEAVSSYEQYF            |                    |         | 0       | 1       | 0       | 2137    | RT3-GT3         | 2        |
| CAASASSGSWQLIF_CASGDQGGQNTLYF              | Shared Clonotype 2 |         | 0       | 249     | 100     | 0       | RT2-GT3         | 2        |
| CAVSMNNYAQGLTF_CASSDGGSTGQLYF              |                    |         | 1       | 0       | 225     | 0       | RT2-GT2         | 2        |
| CALGSNMGYKLTFCASSGQGNIAEQFF                | Shared Clonotype 3 |         | 53      | 0       | 0       | 102     | RT3-GT2         | 2        |
| CAASGTGANTGKLTF_CASSPGTGGYEQYF             |                    |         | 69      | 8       | 0       | 0       | GT2-GT3         | 2        |
| CALGEDSGTYQRF_CASKQNQDTQYF                 |                    |         | 1       | 0       | 52      | 0       | RT2-GT2         | 2        |
| CAIAFNSAGNKLTF_CASSDAEQFF                  |                    |         | 1       | 0       | 8       | 0       | RT2-GT2         | 2        |
| CVLGDHTGANTGKLTF_CASSRDWGQDTQYF            |                    |         | 0       | 1       | 8       | 0       | RT2-GT3         | 2        |
| CAVSMNMGYKLTFCASSPGLGGAETLYF               |                    |         | 0       | 0       | 2       | 2       | RT2-RT3         | 2        |
| CAASASSGSWQLIF_CASSRDWGGGQNTLYF            |                    |         | 1       | 0       | 0       | 1       | RT3-GT2         | 2        |

**Supplemental Table 3: Shared TCR clonotypes in different TIL samples.** TIL Samples with TCR VDJ information in the UMAP (Regr2-TIL, Grow2-TIL, Regr3-TIL, Grow3-TIL) were evaluated for any clonotypes that are shared between samples. The 13 shared clonotypes are shown. For each TCR clonotype, values are shown for the number of cells in each of the 4 TIL samples. 3 of the shared clonotypes were chosen based on the number of samples (Shared Clonotype 1 = 3 samples on the UMAP; 4 samples if including RT1; Shared Clonotype 2 = 2 samples; Shared Clonotype 3 = 2 samples) and on whether there were at least 50 cells of that clonotype in more than one sample. As noted in Supplemental Table 1, the The 5'/TCR sample from Regressor #1 was overloaded with cells (~50,000) so while ~22,000 cells had complete TCR VDJ regions sequenced, the RNA expression data was not deep enough and deemed not useful for analysis.

Supplemental Table 4: TCRβ CDR3 sequences analyzed by GLIPH cluster into top 10 Groups.

| Group | Consensus         | Sequence         | GT2    | GT3    | RT1    | RT2    | RT3    | Group | Consensus    | Sequence       | GT2   | GT3   | RT1    | RT2   | RT3   |
|-------|-------------------|------------------|--------|--------|--------|--------|--------|-------|--------------|----------------|-------|-------|--------|-------|-------|
| 1     | CASSL(E)GTGGYEQYF | CASSLEPVYAEQFF   | 0      | 0      | 0      | 0.258  | 0      | 7     | CASSDGEQFF   | CASSTGEQYF     | 0.031 | 0     | 0      | 0     | 0     |
|       |                   | CASSLELGGLEQYF   | 1.898  | 0      | 0      | 0.117  | 0      |       |              | CASSLGEVFF     | 0     | 0     | 0      | 0.023 | 0     |
|       |                   | CASSLEPGGYEQYF   | 0      | 0.067  | 0      | 0      | 0      |       |              | CASSDGRQFF     | 0     | 0     | 0      | 0.023 | 0     |
|       |                   | CASSLERTGGYEQYF  | 0      | 0      | 0      | 14.678 | 0      |       |              | CASSLEEVFF     | 0     | 0     | 0.018  | 0     | 0     |
|       |                   | CASSTGTGGYEQYF   | 0      | 0      | 0.013  | 0      | 0      |       |              | CASSDAEVFF     | 0     | 0     | 0      | 0     | 3.246 |
|       |                   | CASSPGTGGFEQYF   | 0      | 0      | 0.004  | 0      | 0      |       |              | CASSDAEQFF     | 0.092 | 0     | 0      | 0.211 | 0     |
|       |                   | CASSLGTGGPEVFF   | 0      | 0      | 0.022  | 0      | 0      |       |              | CASSLHEQYF     | 0     | 0     | 0.044  | 0     | 0     |
|       |                   | CASSPGTVVYEQYF   | 0      | 0      | 0      | 0.047  | 0      | 8     | CGAGTGGYEQYF | CASSDGEQYF     | 0     | 0     | 0.009  | 0     | 0     |
|       |                   | CASSLGTGGYEQYF   | 0      | 0      | 0.004  | 0      | 0      |       |              | CASSDDEQYF     | 0     | 7.620 | 0      | 0     | 0     |
|       |                   | CASSLEGSGGYEQYF  | 0      | 0      | 0.004  | 0      | 0      |       |              | CASSDGEVFF     | 0     | 0     | 0      | 0     | 0.018 |
|       |                   | CASSLEGTGSYEQYF  | 0      | 0      | 0      | 0.211  | 0      |       |              | CGARTGGYEQYF   | 0     | 0.607 | 0      | 0     | 0     |
|       |                   | CASSLGTGGWEQYF   | 0      | 0      | 0.009  | 0      | 0      |       |              | CATGTGGYEQYF   | 0     | 0     | 0      | 0.023 | 0     |
|       |                   | CASSLEPVFAEQFF   | 0.276  | 0      | 0      | 0      | 0      |       |              | CGAKTGGYEQYF   | 0     | 0     | 0.040  | 0     | 0     |
|       |                   | CASSLEPGDSYEQYF  | 0      | 0      | 0.027  | 0      | 0      |       |              | CSVGTGSYEQYF   | 0     | 0     | 0.018  | 0     | 0     |
|       |                   | CASSLEPGENTLYF   | 0      | 0      | 0      | 0.023  | 0      | 9     | CASGDVQNTLYF | CASRLGGYEQYF   | 7.716 | 0     | 0.004  | 2.720 | 0     |
|       |                   | CASSLGLGGHEQYF   | 0      | 0      | 0.009  | 0      | 0      |       |              | CASGDVQNTLYF   | 0.276 | 0     | 0      | 0     | 0     |
|       |                   | CASSAGTGGYEQYF   | 0      | 0.202  | 0.004  | 0      | 0      |       |              | CASGDRQNTLYF   | 0     | 0     | 0      | 6.987 | 0     |
|       |                   | CASSMGTGGYEQYF   | 0      | 0      | 0.009  | 0      | 0      |       |              | CGAGLVQNTLYF   | 0     | 0     | 0      | 0     | 3.772 |
|       |                   | CASSLEGTGGYERYF  | 0      | 0      | 0.004  | 0      | 0      |       |              | CAWSLPNTEVFF   | 0.153 | 0     | 0      | 0     | 0     |
|       |                   | CASSPGTGFFTQYF   | 0      | 0      | 0      | 0      | 0.018  |       |              | CASSDLGTEQFF   | 0     | 0.067 | 0      | 0     | 0     |
|       |                   | CASSLGLGGYEQYF   | 0      | 0      | 0.049  | 0      | 0      |       |              | CASSDAHTEVFF   | 0     | 0.337 | 0      | 0     | 0     |
|       |                   | CASSLEPGSSYEQYF  | 0      | 0      | 9.411  | 0      | 0      | 10    | CASSLGGYEQYF | CASSDANTEVFF   | 0     | 0     | 0.018  | 0     | 0     |
|       |                   | CASSLGTGVYEQYF   | 0      | 0      | 0.013  | 0      | 0      |       |              | CASSDGGTEVFF   | 0.153 | 0     | 0      | 0     | 0     |
|       |                   | CASSPGTGGYEQYF   | 2.358  | 0.539  | 0      | 0      | 0      |       |              | CASSDRNTEVFF   | 0     | 0     | 0.004  | 0     | 0     |
|       |                   | CASSLEGTGDYEQYF  | 0      | 1.618  | 0      | 0      | 0      |       |              | CASSVTGYEQYF   | 0     | 0     | 0.004  | 0     | 0     |
|       |                   | CASSFGTGGYEQYF   | 0      | 0      | 0      | 0.047  | 0      |       |              | CASSNRGREQYF   | 0.031 | 0     | 0      | 0     | 0     |
|       |                   | CASSLEPGGAYEQYF  | 0      | 0      | 0.031  | 0      | 0      |       |              | CASSSGYTEVFF   | 0     | 0     | 0      | 0     | 0.018 |
|       |                   | CASSLEPGGSQNTLYF | 0      | 0      | 0.022  | 0      | 0      |       |              | CASSLGPYEQYF   | 0     | 0     | 0.009  | 0     | 0     |
|       |                   | CASSLELGGYEQYF   | 0      | 0      | 0.218  | 0      | 0      |       |              | CASSPGQYEQYF   | 0     | 0     | 0.036  | 0     | 0     |
|       |                   | CASSSGTGGYEQYF   | 0      | 0      | 0.356  | 0      | 0      |       |              | CASSLGSYEQYF   | 0     | 4.181 | 0      | 0     | 0     |
|       |                   | CASSLEPLYEQYF    | 0      | 0      | 0      | 0.023  | 0      |       |              | CASSLRVYEQYF   | 0     | 0     | 0      | 0     | 0.036 |
|       |                   | CASSLEPVSNERLFF  | 0      | 0.607  | 0      | 0      | 0      |       |              | CASSVRGYEQYF   | 0     | 0     | 0      | 0.023 | 0     |
|       |                   | CASSLEGTGGYEQYF  | 3.582  | 3.709  | 48.788 | 10.645 | 6.092  |       |              | CASSDGGGEVFF   | 0.245 | 0     | 0      | 0.258 | 0     |
|       |                   | CASSLEPTGGYEQYF  | 0      | 0      | 0      | 1.290  | 0      |       |              | CAWSPGHYEQYF   | 0     | 0     | 0      | 0     | 0.018 |
|       |                   | CASSHGTGGYEQYF   | 0      | 0      | 0.018  | 0      | 0      |       |              | CASSLGNTEVFF   | 0.031 | 0     | 0      | 0     | 0     |
|       |                   | CASSLEGTGGHEQYF  | 0      | 0      | 0.004  | 0      | 0      |       |              | CASSLPGVEQYF   | 0     | 0.067 | 0      | 0     | 0     |
|       |                   | CASSLEGTGEYEQYF  | 0      | 0      | 0.004  | 0      | 0      |       |              | CASSLVLYEQYF   | 0.031 | 0     | 0      | 0     | 0     |
|       |                   | CASSLELGGREQYF   | 0.765  | 0      | 0      | 0.047  | 0      |       |              | CASSPRGYEQYF   | 0     | 0     | 0.022  | 0     | 0     |
|       |                   | CASSLGTGVSEYQYF  | 0      | 0      | 0.018  | 0      | 0      |       |              | CASSFGGREQYF   | 0     | 0     | 0      | 0.023 | 0     |
| 2     | CASSLEAVSSYEQYF   | CASSLEAVSSYEQYF  | 0      | 0.067  | 0      | 0      | 49.429 |       |              | CASSPGHYEQYF   | 0     | 0     | 0      | 0.023 | 0     |
|       |                   | CAISLEAVSSYEQYF  | 0      | 0      | 0      | 0      | 0.018  |       |              | CASSLKGREVFF   | 0     | 0     | 0.018  | 0     | 0     |
| 3     | CASSDQGNYAEQFF    | CASSGQGNYAEQFF   | 10.165 | 0      | 0      | 0      | 1.904  |       |              | CASSLPGTEVFF   | 0     | 0     | 0      | 0.023 | 0     |
|       |                   | CASSDQGNYAEQFF   | 18.647 | 0      | 0      | 0      | 0      |       |              | CASSSQTEVFF    | 0     | 0     | 0.018  | 0     | 0     |
| 4     | CASGDQGCQNTLYF    | CASSDPGNYAEQFF   | 0      | 0      | 0      | 2.462  | 0      |       |              | CASSLGGREQYF   | 0     | 0     | 0.058  | 0     | 0     |
|       |                   | CASGDQGGQNTLYF   | 0.031  | 19.150 | 0      | 3.259  | 0      |       |              | CASSQGQYEQYF   | 0     | 0     | 0.009  | 0     | 0     |
| 5     | CASSLTGGQNTLYF    | CASGDQGCQNTLYF   | 0.031  | 0      | 0      | 0      | 0      |       |              | CASSLGNYEQYF   | 0     | 0     | 0.004  | 0     | 0     |
|       |                   | CASSLWGGQDTQYF   | 0      | 0      | 0.013  | 0      | 0      |       |              | CASSVRGREQYF   | 0.031 | 0     | 0      | 0     | 0     |
|       |                   | CASSPTGVGNTLYF   | 0      | 0      | 0.018  | 0      | 0      |       |              | CASSLRPYEQYF   | 0     | 0     | 0.018  | 0     | 0     |
|       |                   | CASSGTGGQNTLYF   | 0      | 0      | 0      | 0      | 0.163  |       |              | CASSLGYTEVFF   | 0     | 0     | 0.018  | 0     | 0     |
|       |                   | CASSLAGDGNTLYF   | 0      | 0      | 0.022  | 0      | 0      |       |              | CASSLTSYEQYF   | 0     | 0     | 0.004  | 0     | 0     |
|       |                   | CASSDGLGQDTQYF   | 0      | 0      | 0      | 0.047  | 0      |       |              | CASSHRGREQYF   | 0     | 0     | 0      | 0     | 0.036 |
|       |                   | CASSLAGDQNTLYF   | 0.031  | 0      | 0      | 0      | 0      |       |              | CASSLVSYEQYF   | 0     | 0     | 0.004  | 0     | 0     |
|       |                   | CASSGTGGGNTLYF   | 0      | 0.067  | 0      | 0      | 0      |       |              | CASSDGNTVFF    | 0.092 | 0     | 0      | 0     | 0     |
|       |                   | CASSLAGGNTLYF    | 0      | 0      | 0.004  | 0      | 0      |       |              | CASSPGNTEVFF   | 0     | 0     | 0.013  | 0     | 0     |
|       |                   | CTSSPTGVGNTLYF   | 0      | 0      | 0.004  | 0      | 0      |       |              | CASSLQGTEVFF   | 0     | 0     | 0.009  | 0     | 0     |
|       |                   | CASSLTGGVDTQYF   | 0      | 0      | 0.004  | 0      | 0      |       |              | CASSHGGYEQYF   | 0     | 0.270 | 0      | 0     | 0     |
|       |                   | CASSATGGQDTQYF   | 0      | 0.539  | 0      | 0      | 0      |       |              | CASSIRNTEVFF   | 0     | 0     | 0.004  | 0     | 0     |
|       |                   | CAWSLTGGGNTLYF   | 0      | 0      | 0.004  | 0      | 0      |       |              | CASSLVPYEQYF   | 0.031 | 0     | 0      | 0     | 0     |
|       |                   | CASSTLGGQDTQYF   | 0      | 0      | 0.018  | 0      | 0      |       |              | CASSSGNTEVFF   | 0     | 0     | 0.009  | 0     | 0     |
|       |                   | CASSEGGGQDTQYF   | 0      | 0      | 0.004  | 0      | 0      |       |              | CASSIPGTEVFF   | 0     | 0     | 0      | 0     | 0.018 |
|       |                   | CASSLTGGQDTQYF   | 0      | 11.126 | 0      | 0      | 0      |       |              | CASSFRGREQYF   | 0     | 0     | 0.018  | 0     | 0.163 |
|       |                   | CASSGTGGQDTQYF   | 0      | 0.135  | 0      | 0      | 0.073  |       |              | CASSPGGYEQYF   | 0.061 | 0     | 0      | 0.023 | 0     |
|       |                   | CASSALGGQDTQYF   | 0.031  | 0      | 0      | 0      | 0      |       |              | CASSDVGGEQYF   | 0.031 | 0     | 0      | 0     | 0     |
|       |                   | CASSETGGQDTQYF   | 0      | 0      | 0.076  | 1.383  | 0      |       |              | CASSIGGREQYF   | 0     | 0     | 0.013  | 0     | 0     |
|       |                   | CASSLTGVGNTLYF   | 0      | 0      | 0.013  | 0      | 0      |       |              | CASSLGQYEQYF   | 0     | 0     | 0.067  | 0     | 0     |
|       |                   | CASSRTGGGNTLYF   | 0.031  | 0      | 0      | 0      | 0      |       |              | CASSDRGREQYF   | 0     | 0     | 0.004  | 0     | 0     |
|       |                   | CASSDGGGQDTQYF   | 5.879  | 0      | 0      | 0      | 0      |       |              | CASSLGRYEQYF   | 0     | 0     | 0.187  | 0     | 0     |
| 6     | CASSVTGGSYEQYF    | CASSRTGGAYEQYF   | 0      | 0      | 0      | 0      | 0.018  |       |              | CASSRTGGAYEQYF | 0     | 0     | 0      | 0     | 0.018 |
|       |                   | CANSVTGGSYEQYF   | 0      | 0      | 0.004  | 0      | 0      |       |              | CASSCTGGAYEQYF | 0     | 0     | 0      | 0     | 0.018 |
|       |                   | CASSRTGGYEQYF    | 0      | 0      | 0      | 0.023  | 0      |       |              | CASSRTGGYEQYF  | 0     | 0     | 0      | 0.023 | 0     |
|       |                   | CASSRSGGSYEQYF   | 0      | 0      | 0      | 0      | 0.018  |       |              | CASSRSGGSYEQYF | 0     | 0     | 0      | 0     | 0.018 |
|       |                   | CASNVTGGSYEQYF   | 0      | 0      | 0.004  | 0      | 0      |       |              | CASNVTGGSYEQYF | 0     | 0     | 0.004  | 0     | 0     |
|       |                   | CASSVTGGSYEQYF   | 0      | 0      | 12.920 | 0      | 0      |       |              | CASSVTGGSYEQYF | 0     | 0     | 12.920 | 0     | 0     |

**Supplemental Table 4: TCR $\beta$  CDR3 sequences analyzed by GLIPH clustering into top 10 groups.**

All TCR $\beta$  CDR3 sequences from 5 TIL samples (GT2 = Progressing TIL #2; GT3 = Progressing TIL #3; RT1 = Regressing TIL #1; RT2 = Regressing TIL #2; RT3 = Regressing TIL #3) were analyzed using the GLIPH algorithm. Specificity groups were ordered based on the sum of the abundance of each sequence in the specificity group in each of the 5 samples, to capture the most expanded clonotypes in the dataset and their related sequences. The 10 specificity groups with the highest sum of sequence abundances are shown. CDR3 sequences within these top 10 GLIPH groups are shown with their percent in each TIL sample (% = the number of a unique CDR3 sequence / the number of total CDR3 sequences in any given sample).

**Supplemental Table 5: Differential gene expression between progressing TILs and naïve T cells or between regressing TILs and naïve T cells**

| Gene       | Progressing Fold Change | Progressing Adjusted P-value | Regressing Fold Change | Regressing Adjusted P-value |
|------------|-------------------------|------------------------------|------------------------|-----------------------------|
| Ccl4       | 8.70                    | 2.52E-02                     | 12.42                  | 1.86E-05                    |
| Gzmf       | 15.63                   | 3.34E-05                     | 1.00                   | NA                          |
| Ifitm1     | 8.60                    | 7.99E-06                     | 8.03                   | 9.48E-01                    |
| Gzmb       | 7.46                    | 3.92E-07                     | 8.24                   | 1.05E-04                    |
| Lag3       | 6.42                    | 7.19E-13                     | 6.35                   | 4.61E-07                    |
| Pdcd1      | 6.54                    | 6.22E-11                     | 6.06                   | 6.64E-06                    |
| Klrc1      | 4.94                    | 4.66E-08                     | 5.96                   | 2.39E-09                    |
| Tnfrsf9    | 5.76                    | 2.54E-13                     | 5.02                   | 2.49E-04                    |
| Rgs16      | 5.31                    | 8.10E-05                     | 4.76                   | 1.76E-02                    |
| Ccl5       | 3.53                    | 1.00E-01                     | 6.50                   | 4.74E-09                    |
| S100a4     | 5.25                    | 5.10E-11                     | 3.99                   | 6.70E-05                    |
| S100a6     | 8.11                    | 7.10E-09                     | 1.00                   | NA                          |
| Bhlhe40    | 4.46                    | 2.96E-09                     | 4.22                   | 7.12E-05                    |
| Lgals3     | 4.06                    | 2.85E-02                     | 4.33                   | 3.18E-07                    |
| Ccl3       | 3.89                    | 1.44E-03                     | 4.39                   | 3.39E-03                    |
| Lgals1     | 4.44                    | 5.42E-16                     | 3.77                   | 7.96E-06                    |
| Anxa2      | 4.40                    | 2.17E-09                     | 3.74                   | 1.80E-01                    |
| Cxcr6      | 3.57                    | 3.14E-08                     | 4.52                   | 4.47E-09                    |
| Ifng       | 3.89                    | 1.94E-01                     | 3.82                   | 2.16E-01                    |
| Mt1        | 3.38                    | 2.84E-02                     | 4.32                   | 1.79E-01                    |
| Bcl2a1d    | 3.53                    | 4.62E-13                     | 3.70                   | 2.72E-06                    |
| Bcl2a1b    | 3.52                    | 6.54E-07                     | 3.66                   | 1.31E-03                    |
| Klrk1      | 3.49                    | 4.05E-04                     | 3.52                   | 4.15E-04                    |
| AW112010   | 2.97                    | 8.86E-06                     | 3.98                   | 2.14E-05                    |
| Icos       | 2.96                    | 2.99E-01                     | 3.91                   | 3.75E-02                    |
| Litaf      | 3.37                    | 4.95E-05                     | 3.36                   | 3.69E-04                    |
| Sh2d2a     | 3.46                    | 6.26E-04                     | 3.22                   | 6.08E-02                    |
| Serpina9   | 3.48                    | 2.68E-08                     | 3.10                   | 4.71E-05                    |
| Ctla4      | 3.17                    | 3.27E-03                     | 3.40                   | 5.70E-03                    |
| Serpina6b  | 3.71                    | 2.31E-05                     | 2.71                   | 1.29E-02                    |
| Capg       | 3.68                    | 9.92E-06                     | 2.66                   | 1.20E-01                    |
| Nkg7       | 2.72                    | 1.19E-07                     | 3.22                   | 1.72E-07                    |
| Prf1       | 2.76                    | 8.73E-05                     | 3.08                   | 7.90E-04                    |
| Klrd1      | 2.81                    | 2.38E-03                     | 3.01                   | 3.84E-04                    |
| Id2        | 2.76                    | 4.88E-02                     | 2.93                   | 3.48E-03                    |
| Nr4a2      | 2.53                    | 1.79E-02                     | 3.10                   | 3.72E-04                    |
| Il2rb      | 2.89                    | 1.41E-06                     | 2.69                   | 8.43E-02                    |
| Gzma       | 2.70                    | 9.60E-01                     | 2.82                   | 6.33E-01                    |
| Srgn       | 2.65                    | 1.25E-04                     | 2.85                   | 2.74E-04                    |
| Ly6a       | 1.00                    | NA                           | 4.43                   | 3.54E-04                    |
| S100a11    | 2.61                    | 1.62E-03                     | 2.73                   | 1.47E-02                    |
| Hif1a      | 2.64                    | 2.24E-03                     | 2.69                   | 4.84E-04                    |
| Aldoa      | 2.53                    | 1.63E-04                     | 2.73                   | 6.38E-04                    |
| Ctla2a     | 3.03                    | 3.24E-01                     | 2.20                   | 4.18E-01                    |
| Vim        | 3.21                    | 1.60E-04                     | 1.92                   | 2.57E-02                    |
| Ndfip1     | 2.53                    | 1.51E-04                     | 2.54                   | 4.02E-03                    |
| Dusp5      | 2.09                    | 6.54E-02                     | 2.95                   | 9.11E-04                    |
| Havcr2     | 2.57                    | 1.35E-04                     | 2.46                   | 1.36E-02                    |
| Sdf4       | 2.59                    | 4.47E-09                     | 2.40                   | 6.10E-04                    |
| AC163354.1 | 2.43                    | 5.14E-05                     | 2.54                   | 2.66E-04                    |
| Ifitm2     | 3.85                    | 1.32E-01                     | 1.00                   | NA                          |
| Tpi1       | 2.43                    | 5.98E-03                     | 2.24                   | 7.29E-02                    |
| Ptms       | 2.30                    | 8.80E-02                     | 2.33                   | 3.49E-01                    |
| Glrx       | 2.13                    | 1.89E-01                     | 2.45                   | 4.81E-02                    |
| Tnfrsf18   | 2.35                    | 2.55E-06                     | 2.16                   | 3.63E-01                    |
| Nr4a1      | 1.99                    | 5.31E-02                     | 2.46                   | 4.10E-01                    |
| Irf8       | 2.31                    | 4.52E-02                     | 2.13                   | 4.66E-02                    |
| Sub1       | 2.00                    | 1.04E-12                     | 2.42                   | 2.70E-10                    |

**Supplemental Table 5: Differential gene expression between progressing TILs vs. naïve, or between regressing TILs vs. naïve T cells.** Cells in activated clusters of the UMAP (A1-A6) from either progressing TIL samples (n = 3200 cells) or regressing TIL samples (n = 7590 cells) were compared to naïve T cell clusters (N1-N3) from all samples (n = 7155 cells) using Seurat's FindConservedMarkers function to identify differentially expressed genes, controlled for cohort. Compared to naïve T cells, genes most upregulated in progressing TILs and in regressing TILs are shown.



**Supplemental Table 6: Differential gene expression between either cells with Progressor Top Clonotypes or cells with Regressor Top Clonotypes, compared to Other Clonotypes in spleens.**

| Gene      | Progressing Fold Change | Progressing Adjusted P-value | Regressing Fold Change | Regressing Adjusted P-value |
|-----------|-------------------------|------------------------------|------------------------|-----------------------------|
| Gzmf      | 9.04                    | 8.41E-302                    | 1.00                   | NA                          |
| Ifi27l2a  | -2.65                   | 4.18E-123                    | 1.30                   | 7.70E-01                    |
| Ly6c2     | -1.38                   | 7.37E-02                     | 2.12                   | 1.10E-85                    |
| Hspa1a    | 4.22                    | 4.63E-56                     | 1.00                   | NA                          |
| Isg15     | -1.46                   | 4.19E-09                     | 1.49                   | 3.59E-31                    |
| Tsc22d3   | 1.03                    | 7.26E-07                     | -1.65                  | 1.27E-54                    |
| Bst2      | -1.43                   | 1.24E-24                     | 1.18                   | 4.42E-05                    |
| Irf7      | -1.40                   | 9.40E-13                     | 1.19                   | 9.70E-05                    |
| Zfp36     | 1.05                    | 4.19E-35                     | -1.53                  | 2.32E-48                    |
| Zbp1      | -1.17                   | 8.90E-01                     | 1.41                   | 7.79E-55                    |
| Stat1     | -1.22                   | 6.52E-01                     | 1.35                   | 6.55E-50                    |
| Ms4a6b    | -1.29                   | 4.46E-17                     | 1.28                   | 2.06E-41                    |
| Gstp1     | 1.38                    | 8.42E-39                     | -1.17                  | 3.22E-10                    |
| Cxcr3     | -1.31                   | 2.09E-11                     | 1.23                   | 1.59E-20                    |
| Ifi209    | -1.33                   | 7.37E-05                     | 1.16                   | 5.13E-04                    |
| Ifi214    | -1.25                   | 4.63E-04                     | 1.20                   | 2.11E-09                    |
| Ifi213    | -1.32                   | 3.79E-11                     | 1.12                   | 4.56E-03                    |
| Igtp      | -1.22                   | 5.29E-01                     | 1.20                   | 5.54E-24                    |
| Hist1h2ap | 3.30                    | 1.70E-53                     | 1.00                   | NA                          |
| Ccl4      | 2.77                    | 1.25E-174                    | 4.81                   | 1.76E-249                   |
| Mt1       | 4.21                    | 2.04E-302                    | 5.90                   | 0.00E+00                    |
| Gzmd      | 2.66                    | 4.75E-115                    | 1.00                   | NA                          |
| Ly6a      | 1.60                    | 7.42E-144                    | 3.11                   | 0.00E+00                    |
| Gzme      | 2.37                    | 2.94E-128                    | 1.00                   | NA                          |
| Ccl5      | 1.00                    | NA                           | 2.35                   | 2.45E-287                   |
| Gzmc      | 2.29                    | 1.74E-182                    | 1.00                   | NA                          |
| Serpib9b  | 2.17                    | 2.77E-102                    | 1.00                   | NA                          |
| Vim       | 2.86                    | 0.00E+00                     | 1.72                   | 4.77E-80                    |
| Nrgn      | 2.13                    | 4.04E-246                    | 1.00                   | NA                          |
| Sv2c      | 2.31                    | 0.00E+00                     | 1.27                   | 7.77E-24                    |
| Gzmb      | 3.70                    | 0.00E+00                     | 4.69                   | 0.00E+00                    |
| AW112010  | 2.07                    | 1.87E-262                    | 3.05                   | 0.00E+00                    |
| Hspa1b    | 1.98                    | 1.30E-57                     | 1.00                   | NA                          |
| Fcer1g    | 1.97                    | 1.15E-41                     | 1.00                   | NA                          |
| Rbm3      | 1.93                    | 3.16E-270                    | 1.00                   | NA                          |
| Icos      | 2.14                    | 1.17E-272                    | 3.06                   | 0.00E+00                    |
| S100a4    | 3.50                    | 0.00E+00                     | 2.62                   | 1.05E-268                   |
| Capg      | 3.15                    | 0.00E+00                     | 2.27                   | 6.74E-150                   |
| Dusp5     | 1.52                    | 3.10E-144                    | 2.40                   | 0.00E+00                    |
| Cxcr6     | 2.15                    | 1.28E-286                    | 3.01                   | 0.00E+00                    |
| Serpib6b  | 2.98                    | 0.00E+00                     | 2.16                   | 1.26E-226                   |
| Gm156     | 1.80                    | 6.90E-103                    | 1.00                   | NA                          |
| Serinc3   | 1.78                    | 5.50E-205                    | 1.00                   | NA                          |
| Ccr2      | 1.00                    | NA                           | 1.76                   | 1.06E-100                   |
| Ccl3      | 2.57                    | 2.06E-100                    | 3.28                   | 2.04E-90                    |
| Klrc1     | 2.54                    | 1.96E-297                    | 3.24                   | 0.00E+00                    |
| Ms4a4b    | 1.00                    | NA                           | 1.68                   | 9.03E-302                   |
| Hilpda    | 1.58                    | 1.56E-104                    | 2.26                   | 1.13E-205                   |
| Pclaf     | 1.67                    | 5.26E-52                     | 1.00                   | NA                          |
| Nr4a1     | 1.35                    | 4.42E-42                     | 1.99                   | 1.64E-190                   |
| H2-K1     | 1.01                    | 2.04E-03                     | 1.64                   | 3.01E-243                   |
| Nkg7      | 1.95                    | 9.74E-290                    | 2.58                   | 0.00E+00                    |

**Supplemental Table 6: Differential gene expression between either cells with Progressor Top Clonotypes or cells with Regressor Top Clonotypes, compared to Other Clonotypes in spleens.** Cells were grouped into clonotypes based on the paired amino acid sequences of their CDR3 $\alpha$  and CDR3 $\beta$  regions. Clonotypes that made up >1% of a regressor sample were classified as “Regressor Top Clonotypes” (6990 cells from 33 clonotypes), clonotypes that made up >1% of a progressor sample were classified as “Progressor Top Clonotypes” (2533 cells from 27 clonotypes), and cells that made up <1% of a spleen sample were classified as “Other Clonotypes” (10363 cells from 10154 clonotypes). Progressor Top Clonotypes (left) were compared to Other Clonotypes, or Regressor Top Clonotypes were compared to Other Clonotypes (right) using Seurat’s FindConservedMarkers function (controlling for cohort) to identify differentially expressed genes; the most differentially expressed genes by fold change are shown.

**Supplemental Table 7: Differential gene expression between cells with progressor top TCR clonotypes and cells with regressor top TCR clonotypes**

| Upregulated Genes in Regressor Top Clonotypes |                  |             |                           |                            | Upregulated Genes in Progressor Top Clonotypes |                  |             |                            |                           |
|-----------------------------------------------|------------------|-------------|---------------------------|----------------------------|------------------------------------------------|------------------|-------------|----------------------------|---------------------------|
| Gene                                          | Adjusted p-value | Fold Change | %Expressing in Regressors | %Expressing in Progressors | Gene                                           | Adjusted p-value | Fold Change | %Expressing in Progressors | %Expressing in Regressors |
| Ifi27l2a                                      | 4.82E-31         | 3.45        | 0.575                     | 0.326                      | Hspa1a                                         | 2.92E-47         | 4.56        | 0.375                      | 0.084                     |
| Ly6c2                                         | 8.98E-45         | 2.92        | 0.8915                    | 0.7105                     | Gzmf                                           | 1.27E-52         | 3.38        | 0.527                      | 0.2185                    |
| Isg15                                         | 1.78E-40         | 2.16        | 0.392                     | 0.195                      | Hist1h2ap                                      | 1.57E-12         | 2.29        | 0.515                      | 0.3825                    |
| Ccl5                                          | 9.67E-28         | 2.00        | 0.9395                    | 0.8785                     | Jun                                            | 4.50E-19         | 2.13        | 0.6685                     | 0.412                     |
| Ly6a                                          | 1.08E-84         | 1.94        | 0.9545                    | 0.91                       | Hspa1b                                         | 1.30E-46         | 2.03        | 0.337                      | 0.0555                    |
| Samhd1                                        | 1.19E-64         | 1.91        | 0.671                     | 0.526                      | Sv2c                                           | 2.35E-131        | 1.82        | 0.6195                     | 0.2215                    |
| Xist                                          | 2.16E-11         | 1.83        | 0.7445                    | 0.4265                     | Nrgn                                           | 1.69E-103        | 1.70        | 0.5575                     | 0.2215                    |
| Ccl4                                          | 5.93E-02         | 1.74        | 0.704                     | 0.7425                     | Tsc22d3                                        | 2.39E-74         | 1.69        | 0.8395                     | 0.535                     |
| Ccr2                                          | 3.47E-20         | 1.73        | 0.4395                    | 0.2105                     | Rbm3                                           | 5.27E-87         | 1.68        | 0.9985                     | 0.9735                    |
| Ms4a4b                                        | 2.09E-124        | 1.71        | 0.9935                    | 0.9915                     | Vim                                            | 1.36E-109        | 1.66        | 0.9895                     | 0.912                     |
| Bst2                                          | 2.27E-31         | 1.69        | 0.588                     | 0.495                      | Gstp1                                          | 4.31E-55         | 1.62        | 0.945                      | 0.8325                    |
| H2-Q7                                         | 2.83E-37         | 1.68        | 0.944                     | 0.9275                     | Dnajb1                                         | 1.53E-08         | 1.61        | 0.715                      | 0.5395                    |
| Irf7                                          | 7.62E-27         | 1.66        | 0.42                      | 0.272                      | Serpib9b                                       | 1.64E-07         | 1.54        | 0.2015                     | 0.1115                    |
| Ms4a6b                                        | 1.14E-93         | 1.65        | 0.9515                    | 0.924                      | Tuba1b                                         | 2.10E-17         | 1.53        | 0.7195                     | 0.5335                    |
| Zbp1                                          | 7.25E-35         | 1.65        | 0.541                     | 0.403                      | Tubb5                                          | 3.47E-23         | 1.49        | 0.8675                     | 0.6825                    |
| Stat1                                         | 7.67E-44         | 1.65        | 0.75                      | 0.689                      | Serinc3                                        | 5.50E-48         | 1.45        | 0.7655                     | 0.4655                    |
| Shisa5                                        | 9.06E-52         | 1.64        | 0.9945                    | 0.9905                     | Cirbp                                          | 5.85E-29         | 1.45        | 0.767                      | 0.4375                    |
| H2-K1                                         | 6.19E-66         | 1.63        | 1                         | 0.9985                     | Stmn1                                          | 2.64E-12         | 1.45        | 0.3195                     | 0.1605                    |
| Ltb                                           | 4.32E-23         | 1.62        | 0.8685                    | 0.852                      | Rpl35a                                         | 5.66E-60         | 1.43        | 0.999                      | 0.9945                    |
| Cxcr3                                         | 1.04E-33         | 1.60        | 0.347                     | 0.1515                     | Ddit4                                          | 4.92E-36         | 1.43        | 0.6495                     | 0.4015                    |
| Rtp4                                          | 1.14E-25         | 1.57        | 0.26                      | 0.0945                     | Il18r1                                         | 1.21E-31         | 1.42        | 0.6815                     | 0.344                     |
| Dusp5                                         | 3.64E-36         | 1.57        | 0.8185                    | 0.7665                     | Itgav                                          | 2.75E-42         | 1.41        | 0.7295                     | 0.4315                    |
| Dynl1                                         | 7.76E-19         | 1.57        | 0.9055                    | 0.869                      | Rpl17                                          | 1.35E-73         | 1.39        | 0.997                      | 0.9895                    |
| Slfn2                                         | 1.26E-25         | 1.54        | 0.827                     | 0.7775                     | Arsb                                           | 8.01E-65         | 1.39        | 0.772                      | 0.4805                    |
| Ifi209                                        | 1.74E-09         | 1.54        | 0.502                     | 0.3645                     | Capg                                           | 1.29E-16         | 1.39        | 0.926                      | 0.747                     |
| Ifit1                                         | 1.55E-18         | 1.52        | 0.146                     | 0.0445                     | Rpl10-ps3                                      | 1.03E-66         | 1.38        | 0.994                      | 0.972                     |
| Ifi214                                        | 1.09E-13         | 1.50        | 0.356                     | 0.1585                     | Csf1                                           | 2.48E-33         | 1.38        | 0.6015                     | 0.329                     |
| Isg20                                         | 4.13E-02         | 1.50        | 0.511                     | 0.447                      | Serpib6b                                       | 1.48E-35         | 1.38        | 0.88                       | 0.7125                    |
| Ifi47                                         | 4.91E-22         | 1.50        | 0.639                     | 0.6                        | Rpl3                                           | 4.62E-137        | 1.36        | 0.9995                     | 0.9935                    |
| Emb                                           | 8.79E-03         | 1.49        | 0.4885                    | 0.4205                     | Ctla2a                                         | 5.31E-26         | 1.36        | 0.8745                     | 0.748                     |
| AW112010                                      | 5.17E-27         | 1.48        | 0.9935                    | 0.998                      | Cd160                                          | 2.98E-26         | 1.36        | 0.6445                     | 0.359                     |
| Nr4a1                                         | 1.41E-02         | 1.48        | 0.518                     | 0.4625                     | Rps26                                          | 2.67E-56         | 1.36        | 0.9995                     | 0.998                     |
| Ifi213                                        | 2.04E-14         | 1.47        | 0.3485                    | 0.1855                     | Gstm5                                          | 6.61E-77         | 1.35        | 0.2605                     | 0.052                     |
| Npc2                                          | 9.30E-21         | 1.47        | 0.911                     | 0.91                       | Il18rap                                        | 3.87E-26         | 1.35        | 0.6185                     | 0.32                      |
| Slfn1                                         | 5.76E-14         | 1.46        | 0.441                     | 0.322                      | Ndrg1                                          | 1.67E-62         | 1.35        | 0.3755                     | 0.1255                    |
| Igtp                                          | 4.35E-09         | 1.46        | 0.449                     | 0.364                      | Rps6                                           | 1.96E-42         | 1.35        | 0.993                      | 0.969                     |
| Vsir                                          | 1.45E-09         | 1.46        | 0.6015                    | 0.518                      | Klrb1c                                         | 1.27E-48         | 1.35        | 0.2065                     | 0.0295                    |
| Tgtp2                                         | 2.10E-13         | 1.46        | 0.3275                    | 0.225                      | Bcl2                                           | 1.60E-37         | 1.34        | 0.7175                     | 0.4565                    |
| Tgif1                                         | 1.05E-14         | 1.44        | 0.4725                    | 0.3795                     | S100a4                                         | 4.53E-33         | 1.34        | 0.9605                     | 0.861                     |
| Itgb7                                         | 5.57E-09         | 1.44        | 0.3485                    | 0.217                      | Ube2c                                          | 5.99E-25         | 1.34        | 0.2155                     | 0.093                     |
| Icos                                          | 9.25E-29         | 1.43        | 0.911                     | 0.912                      | Rpl21                                          | 2.59E-37         | 1.34        | 0.9995                     | 0.997                     |
| Ypel3                                         | 3.24E-09         | 1.43        | 0.804                     | 0.779                      | Ubl3                                           | 2.28E-16         | 1.34        | 0.7985                     | 0.52                      |
| Itgb1                                         | 9.94E-06         | 1.42        | 0.6365                    | 0.6195                     | Hist1h2ae                                      | 1.47E-14         | 1.33        | 0.2515                     | 0.147                     |
| Epsti1                                        | 3.06E-08         | 1.41        | 0.883                     | 0.892                      | Cbx3                                           | 9.00E-22         | 1.32        | 0.624                      | 0.3285                    |
| Mt1                                           | 6.77E-01         | 1.40        | 0.6585                    | 0.7335                     | Rpl28                                          | 2.64E-76         | 1.32        | 0.9985                     | 0.997                     |
| Gm4070                                        | 7.02E-17         | 1.40        | 0.4205                    | 0.305                      | Rpl35                                          | 8.88E-72         | 1.32        | 0.9995                     | 0.996                     |
| Ubal2                                         | 4.88E-15         | 1.40        | 0.791                     | 0.802                      | Hnrnpa1                                        | 3.85E-25         | 1.31        | 0.902                      | 0.7495                    |
| Cxcr6                                         | 1.34E-12         | 1.40        | 0.9345                    | 0.935                      | Rps29                                          | 1.36E-86         | 1.31        | 1                          | 0.9975                    |
| Ifi208                                        | 1.08E-08         | 1.39        | 0.3065                    | 0.1895                     | Slc25a4                                        | 2.00E-30         | 1.30        | 0.813                      | 0.57                      |
| Cd53                                          | 4.15E-45         | 1.39        | 0.914                     | 0.903                      | Rps17                                          | 1.72E-16         | 1.30        | 0.9565                     | 0.873                     |
| Gabarapl2                                     | 4.58E-31         | 1.38        | 0.8555                    | 0.838                      | Pclaf                                          | 2.61E-14         | 1.30        | 0.23                       | 0.0995                    |

**Supplemental Table 7: Differential gene expression between cells with progressor top TCR clonotypes and cells with regressor top TCR clonotypes.** Cells were grouped into clonotypes based on the paired amino acid sequences of their CDR3 $\alpha$  and CDR3 $\beta$  regions. Clonotypes that made up >1% of a regressor sample were classified as “Regressor Top Clonotypes” (6990 cells from 33 clonotypes) and clonotypes that made up >1% of a progressor sample were classified as “Progressor Top Clonotypes” (2533 cells from 27 clonotypes). Regressor Top Clonotypes were compared to Progressor Top Clonotypes (left) or the reverse (right) using Seurat’s FindConservedMarkers function (controlling for cohort) to identify differentially expressed genes; the most differentially expressed genes by fold change are shown.

**Supplemental Table 8: Flow Cytometry Antibodies and MSI antibodies used in the study.**

| <b>Antigen</b>                                 | <b>Fluorophore</b> | <b>Company</b> | <b>Product #</b> | <b>Clone</b> | <b>Dilution</b> |
|------------------------------------------------|--------------------|----------------|------------------|--------------|-----------------|
| <b><i>Flow Cytometry</i></b>                   |                    |                |                  |              |                 |
| <b>Mouse CD3</b>                               | PE                 | Biolegend      | 100307           | 145-2C11     | 1:200           |
| <b>Mouse CD4</b>                               | BV421              | Biolegend      | 100563           | RM4-5        | 1:200           |
| <b>Mouse CD4</b>                               | BV650              | Biolegend      | 100545           | RM4-5        | 1:200           |
| <b>Mouse CD8a</b>                              | BV711              | Biolegend      | 100747           | 53-6.7       | 1:200           |
| <b>Mouse CD45</b>                              | BUV395             | BD Bioscience  | 564279           | 30-F11       | 1:200           |
| <b>Mouse CD69</b>                              | PE/Cy5             | Biolegend      | 104509           | H1.2F3       | 1:200           |
| <b>Mouse CD122</b>                             | PerCP-Cy5.5        | Biolegend      | 123211           | TM-β1        | 1:200           |
| <b>Mouse CD223 (LAG3)</b>                      | PE                 | Biolegend      | 125207           | C9B7W        | 1:200           |
| <b>Mouse CD244</b>                             | BV605              | BD Bioscience  | 740345           | 2B4          | 1:200           |
| <b>Mouse CD279 (PD-1)</b>                      | APC/Cy7            | Biolegend      | 135223           | 29F.1A12     | 1:200           |
| <b>Mouse IFNγ</b>                              | PE                 | eBioscience    | 12-7311-41       | XMG1.2       | 1:250           |
| <b>Mouse Ly6A/E (Sca-1)</b>                    | BV421              | Biolegend      | 108127           | D7           | 1:200           |
| <b>Mouse Ly6C</b>                              | BV421              | Biolegend      | 128031           | HK1.4        | 1:200           |
| <b>Mouse Nur77</b>                             | PerCP-eFluor710    | eBioscience    | 46-5965-82       | 12.14        | 1:100           |
| <b>Mouse Tbet</b>                              | PE/Cy7             | Biolegend      | 644823           | 4B10         | 1:100           |
| <b>Mouse TCRβ</b>                              | APC                | Biolegend      | 109211           | H57-597      | 1:200           |
| <b>Mouse TNFα</b>                              | APC                | Biolegend      | 506307           | MP6-XT22     | 1:250           |
| <b>Live/Dead</b>                               | Green (488)        | Invitrogen     | L23101           | --           | 1:1000          |
| <b><i>Multispectral Immunofluorescence</i></b> |                    |                |                  |              |                 |
| <b>Human Pan-Cytokeratin</b>                   | none               | Dako           | M351501-2        | AE1/AE3      | 1:500           |
| <b>Human CD20</b>                              | none               | Abcam          | ab9475           | L26          | 1:400           |
| <b>Human CD8</b>                               | none               | Dako           | M710301-2        | C8/144B      | 1:100           |
